# Supplementary material for: The new (dis)order in RNA regulation
Source: PubMed Central journal article supplement (PMC4822317; doi:10.1186/s12964-016-0132-3), 2016-04-06
Supplement: 12964_2016_132_MOESM1_ESM.pdf [file 12964_2016_132_MOESM1_ESM.pdf]

**Additional Figure 1.** Properties of RNA-binding, disordered proteins. Disorder and charge profiles for proteins listed in Table 1. The disordered, RNA-binding regions (RBR) are marked in blue in the left panel, and their sequence given in the right panel. Amino acid sequence, GO terms, and annotations for protein domains, isoforms, and post-translational modifications (PTMs) were extracted from UniProt [250]. Disorder was calculated using IUPred [172] using default values. Score above 0.4 indicates the region is intrinsically disordered (in physiological conditions). Charge was calculated using EMBOSS charge [251] using default values. PTMs: A, acetylation; M, methylation; P, phosphorylation; O, other. See Table 1 for literature references for each protein.

# SRSF1

## Serine/arginine-rich splicing factor 1

Alternative-splicing factor 1; Splicing factor, arginine/serine-rich 1; pre-mRNA-splicing factor SF2, P33 subunit (Q07955)

(Homo sapiens)

### PROTEIN

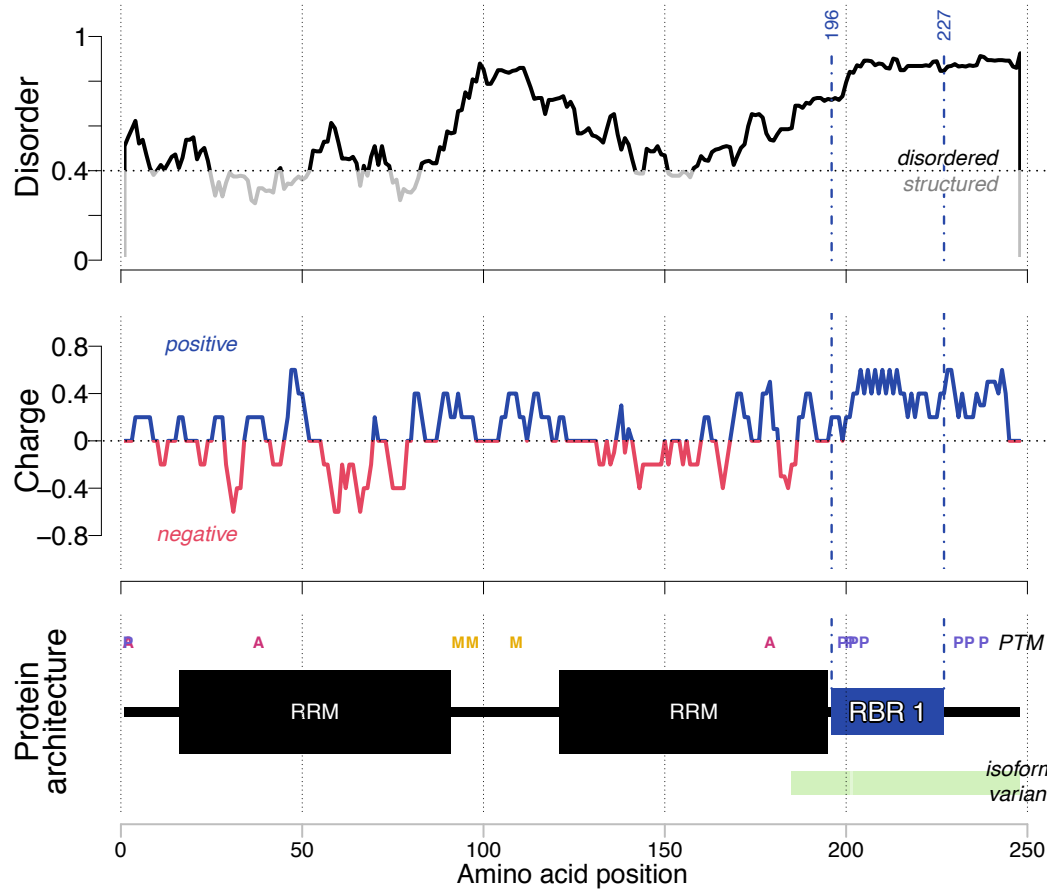

### RNA BINDING DISORDERED PEPTIDE

#### RBR 1

196 G P R S P S Y G R S R S R S R S R S R S R S R S R S N S R S R S Y S 227

#### GO biological processes

cardiac muscle contraction, gene expression, in utero embryonic development, mRNA 3'-end processing, mRNA 5'-splice site recognition, mRNA export from nucleus, mRNA processing, mRNA A splice site selection, mRNA splicing, via spliceosome, regulation of mRNA splicing, via spliceosome, regulation of mRNA stability, regulation of transcription, DNA-templated, reg...

#### GO molecular functions

mRNA binding, nucleotide binding, poly(A) RNA binding, RNA binding

#### GO cellular compartments

catalytic step 2 spliceosome, cytoplasm, extracellular exosome, nuclear speck, nucleoplasm, nucleus

# U2AF2

## Splicing factor U2AF 65 kDa subunit

U2 auxiliary factor 65 kDa subunit; U2 snRNP auxiliary factor large subunit (P26368)

(Homo sapiens)

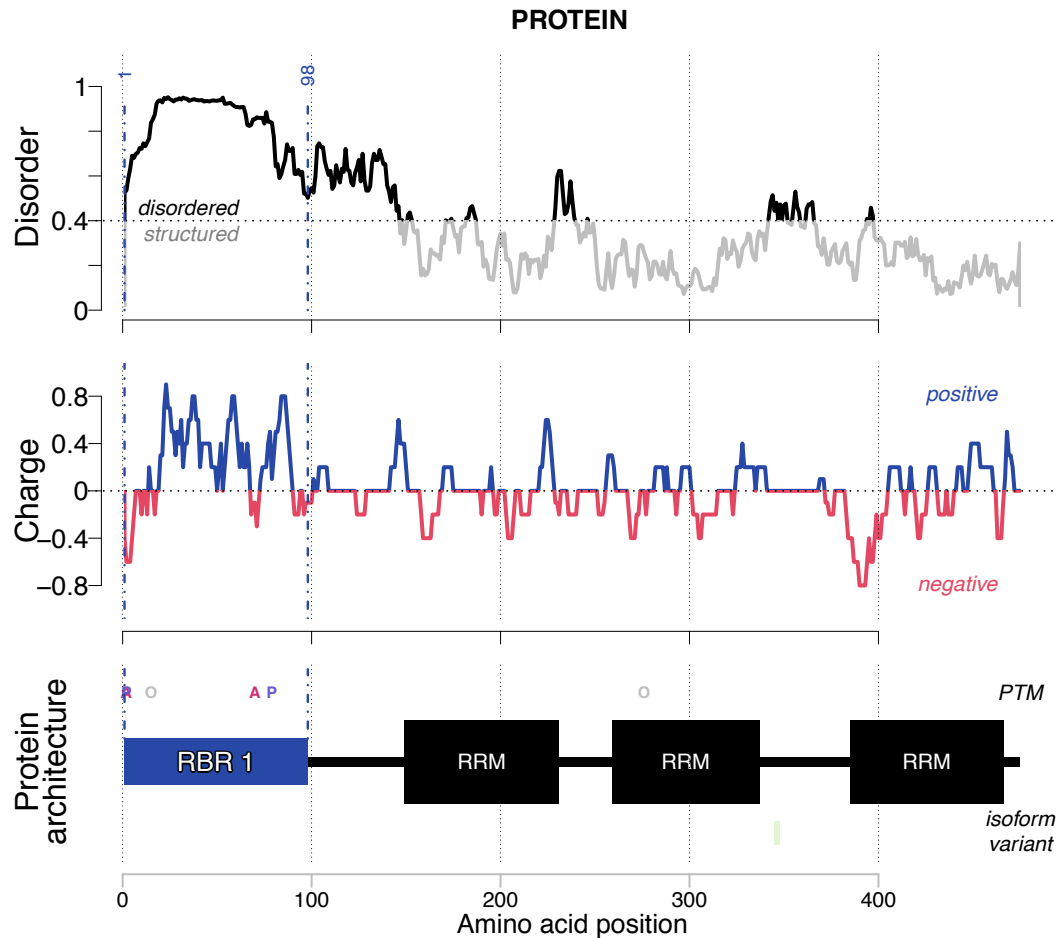

## RNA BINDING DISORDERED PEPTIDE

### RBR 1

1 MSDFDEFERQLNENKQERDKENRHRKRKSHSRSRSDRDKRRSRSDRRNRDQRSASDRRR  
RSKPLTRGAKEEHGGLIRSPRHEKKKKVRKYWDVPPPG 98

### GO biological processes

gene expression, mRNA 3'-end processing, mRNA export from nucleus, mRNA processing, mRNA splicing, via spliceosome, negative regulation of mRNA splicing, via spliceosome, positive regulation of protein targeting to mitochondrion, positive regulation of RNA splicing, regulation of mitochondrion degradation, RNA splicing, termination of RNA polymerase II trans...

### GO molecular functions

enzyme binding, nucleotide binding, poly(A) RNA binding

### GO cellular compartments

nuclear speck, nucleoplasm, spliceosomal complex

### Note:

The primary sequence of RS repeat is not essential for functionality: heterologous RS domains present in functionally unrelated splicing factors can be used as substitutes. Replacing the region (1-94) with 7 RS repeats is sufficient to support splicing. Serine not required for splicing activity. Arg can be replaced by Lys but not Ala.

# NKAP

## NF-kappa-B-activating protein

(Q8N5F7)

(Homo sapiens)

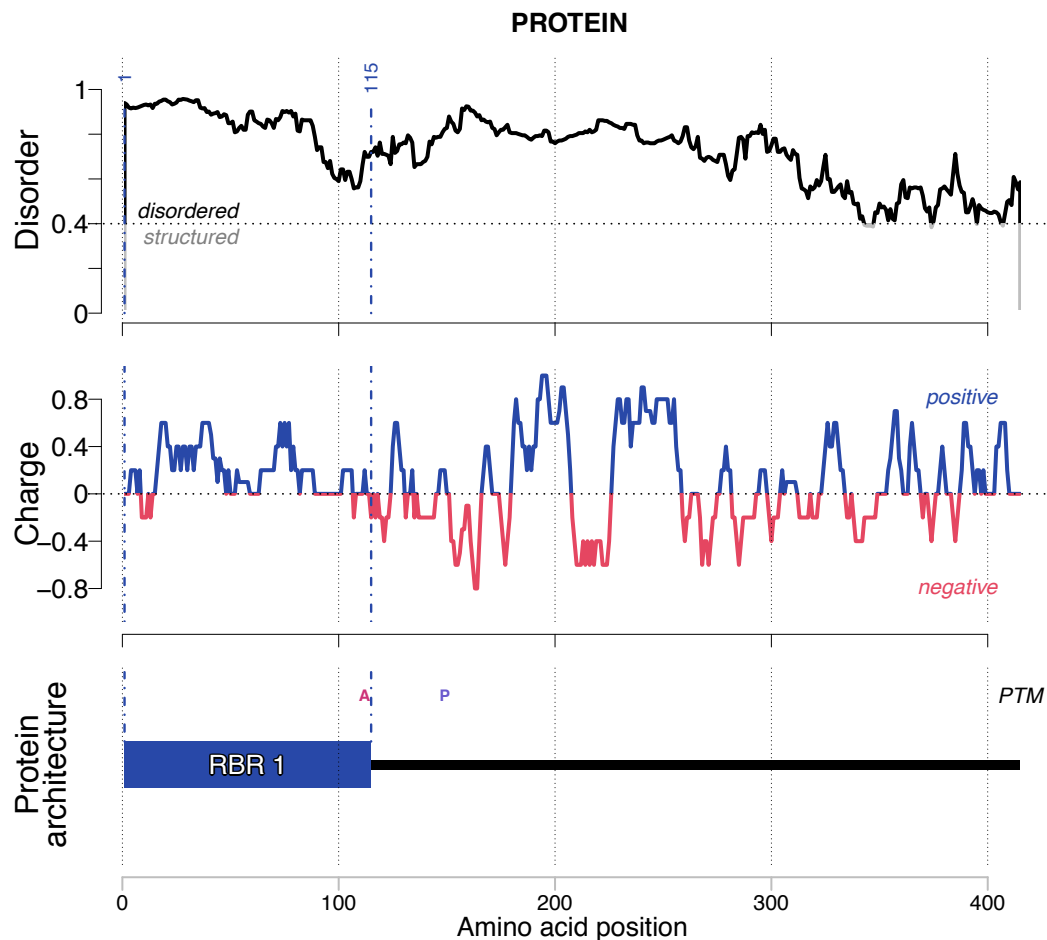

## RNA BINDING DISORDERED PEPTIDE

### RBR 1

1 MAPVSGSRSPDREASGGGRRRSSSKSPKPSKSAARSPPGRRRSRSHSCSRSGDRNGLTHQL  
GGLSQGSRNQS YRSRSRSRSRERPSAPRGI PFASASSSVYYGSYSR PYGSDK PWP 115

### GO biological processes

granulocyte differentiation, hematopoietic stem cell proliferation, negative regulation of transcription from RNA polymerase II promoter, negative regulation of transcription, DNA-templated, Notch signaling pathway, positive regulation of alpha-beta T cell differentiation, positive regulation of protein targeting to mitochondrion, stem cell maintenance, T ce...

### GO molecular functions

chromatin binding, chromatin DNA binding, poly(A) RNA binding

### GO cellular compartments

cytoplasm, nucleoplasm

### Note:

An additional domain, DUF 926, contributes to RNA binding in addition to the region highlighted. This protein is overall quite disordered (mean 0.73), contains a basic, Lys rich, disordered central region (required for nuclear speckle localisation).

# Nucleocapsid protein

## Nucleoprotein

Nucleocapsid protein  
(P59595)

(Human SARS coronavirus)

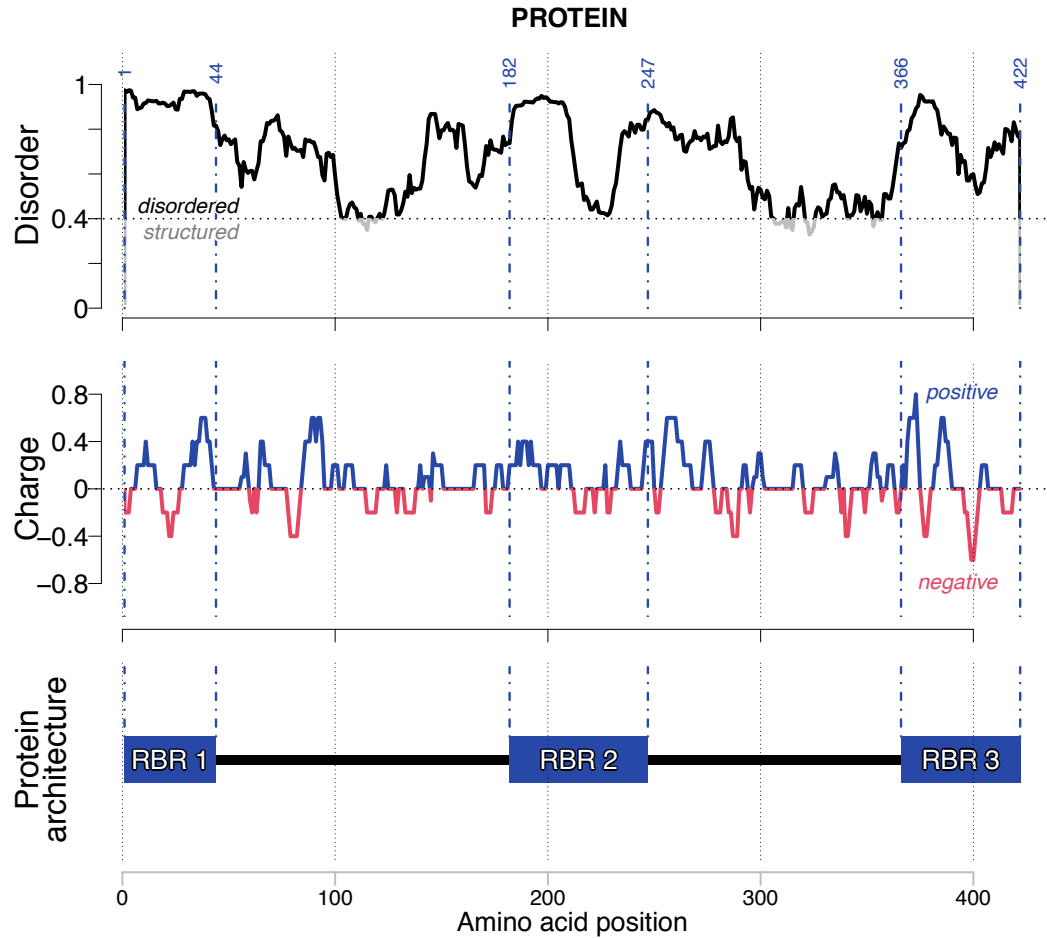

## RNA BINDING DISORDERED PEPTIDE

### RBR 1

1 **M**SDNGPQSNQRSAPRI**I**FGGPTDSTDNNQNGGRNGAR**P**KQRR**P**Q 44

### RBR 2

182 **Q**ASSRSSRSR**G**NSRN**S**T**P**GSSR**G**NS**P**ARMASGGGETALALLLL**D**RL**N**QL**E**SKV**S**G**K**G**Q**Q  
QQGQTV<sup>247</sup>

### RBR 3

366 **P**TEPKKDKKKKT**D**E**A**Q**L**P**Q**R**Q**KK**P**T**V**TLL**P**AA**D**M**D**FS**R**QL**Q**NS**M**SGAS**A**D**S**T**Q**A 422

## GO biological processes

-

## GO molecular functions

RNA binding

## GO cellular compartments

host cell endoplasmic reticulum–Golgi intermediate compartment, host cell Golgi apparatus, host cell perinuclear region of cytoplasm, viral nucleocapsid

### Note:

This protein has 5 RNA-binding regions, of which two are structured. They are flanked by three disordered RNA binding regions.

# ALYREF

## Aly/REF export factor 2

Alyref; RNA and export factor-binding protein 2  
(Q9JJW6)

(Mus musculus)

### PROTEIN

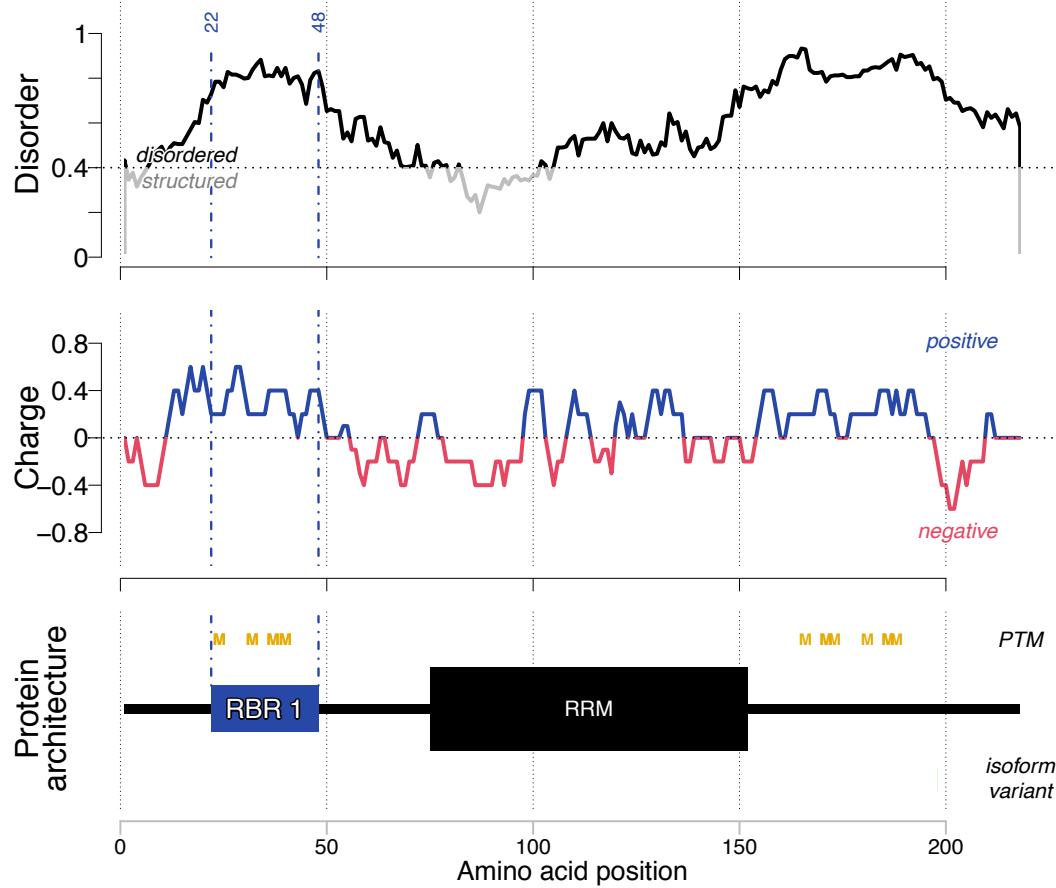

### RNA BINDING DISORDERED PEPTIDE

#### RBR 1

22 VNRGGGPRRRNRPAIARGGRNRPA PYSR 48

#### GO biological processes

mRNA export from nucleus, mRNA processing, mRNA transport, RNA splicing

#### GO molecular functions

mRNA binding, nucleotide binding, RNA binding, single-stranded DNA binding

#### GO cellular compartments

cytoplasm, spliceosomal complex

# Aven

## Cell death regulator Aven

(Q9NQS1)

(Homo sapiens)

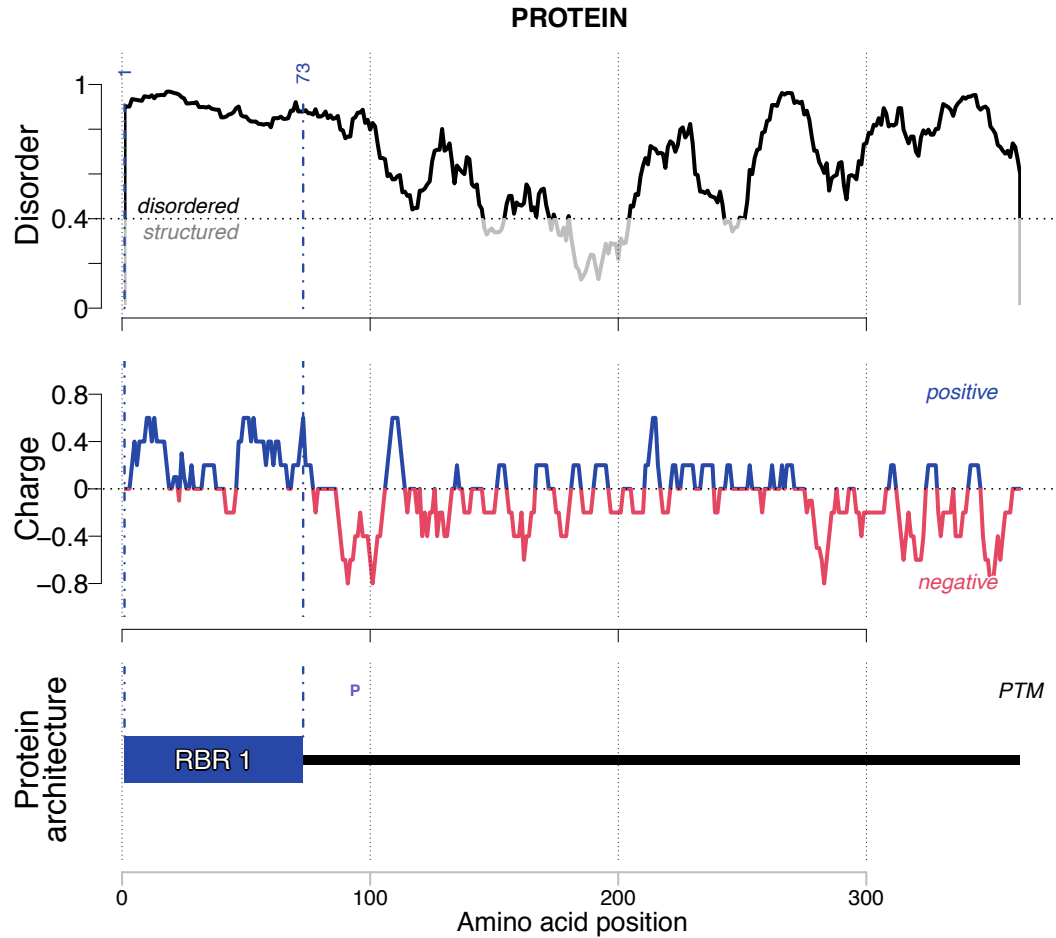

## RNA BINDING DISORDERED PEPTIDE

RBR 1

1 MQAERGARGGRRRPGRGRPGGDRHSEIRPGAAAAVARGGGGGGGGGDGGRRRGRGRGRFR  
GARGGRRGGGGAPR 73

**GO biological processes**  
apoptotic process, negative regulation of apoptotic process

**GO molecular functions**

**GO cellular compartments**  
endomembrane system, intracellular, membrane

**Note:**  
Negative regulation of apoptosis. Aven expression is increased in certain leukemias and osteosarcomas.

# Caprin-1

## Caprin-1

Cell cycle-associated protein 1; Cytoplasmic activation- and proliferation-associated protein 1; GPI-anchored membrane protein 1; GPI-anchored protein p137... (Q14444)

(Homo sapiens)

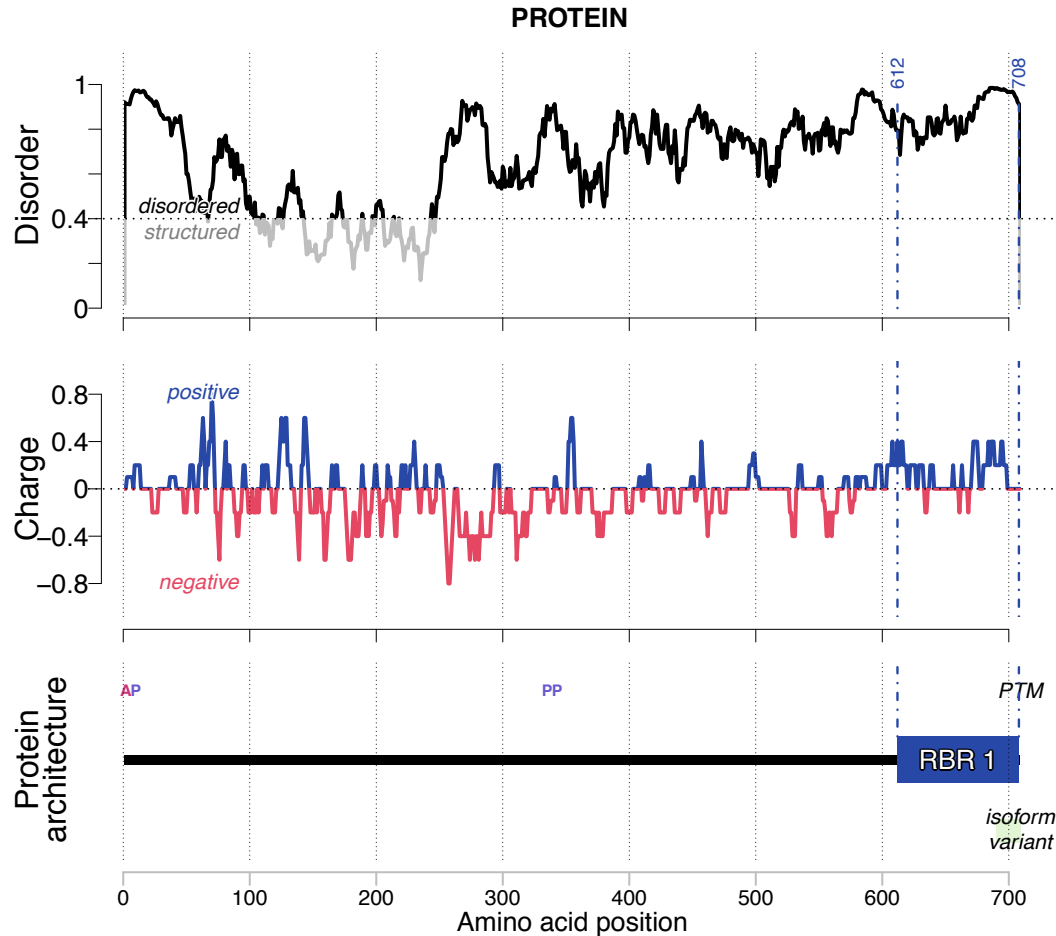

## RNA BINDING DISORDERED PEPTIDE

### RBR 1

612 RGGSRGARGLMNGYRGPANGFRGGYDGYRPSFSNTPNNGYTSQSQFSAAPRDYSGYQRDGYQ  
QNFKRGSQSGPRGAPRRGRGGPPRPNRGMPPQIMNTQQV708

### GO biological processes

negative regulation of translation, positive regulation of dendrite morphogenesis, positive regulation of dendritic spine morphogenesis

### GO molecular functions

poly(A) RNA binding, RNA binding

### GO cellular compartments

cytoplasm, cytoplasmic mRNA processing body, cytoplasmic stress granule, cytosol, dendrite, integral component of plasma membrane, membrane

### Note:

Study by Solomon et al. found that mutating the Args of the three RGGs present in the human sequence into AGGs strongly reduced RNA binding. The Xenopus sequence represents the first part in the human sequence studied. Shiina et al. identified an additional, Lys-rich N-terminal sequence in the Xenopus protein as RNA-binding.



# Caprin-1

## RNA granule protein 105

(Q75T15)  
(Xenopus laevis)

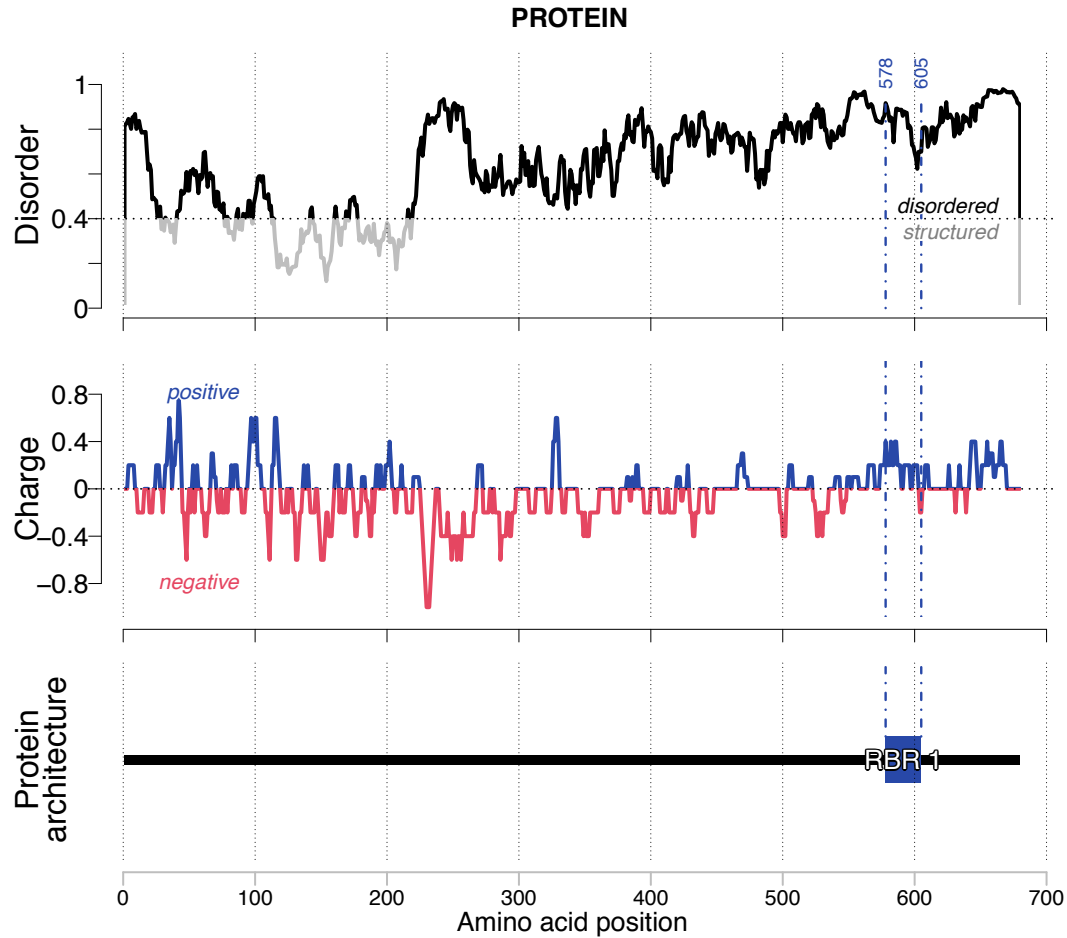

## RNA BINDING DISORDERED PEPTIDE

**RBR 1**  
578 RGMARGGGQRGNRGMNMGYRQSNNGFRGG 605

GO biological processes

GO molecular functions

GO cellular compartments

### Note:

Study by Solomon et al. found that mutating the Args of the three RGGs present in the human sequence into AGGs strongly reduced RNA binding. The Xenopus sequence represents the first part in the human sequence studied. Shiina et al. identified an additional, Lys-rich N-terminal sequence in the Xenopus protein as RNA-binding.

# DDX4

## Probable ATP-dependent RNA helicase DDX4

DEAD box protein 4; Vasa homolog  
(Q9NQI0)

(Homo sapiens)

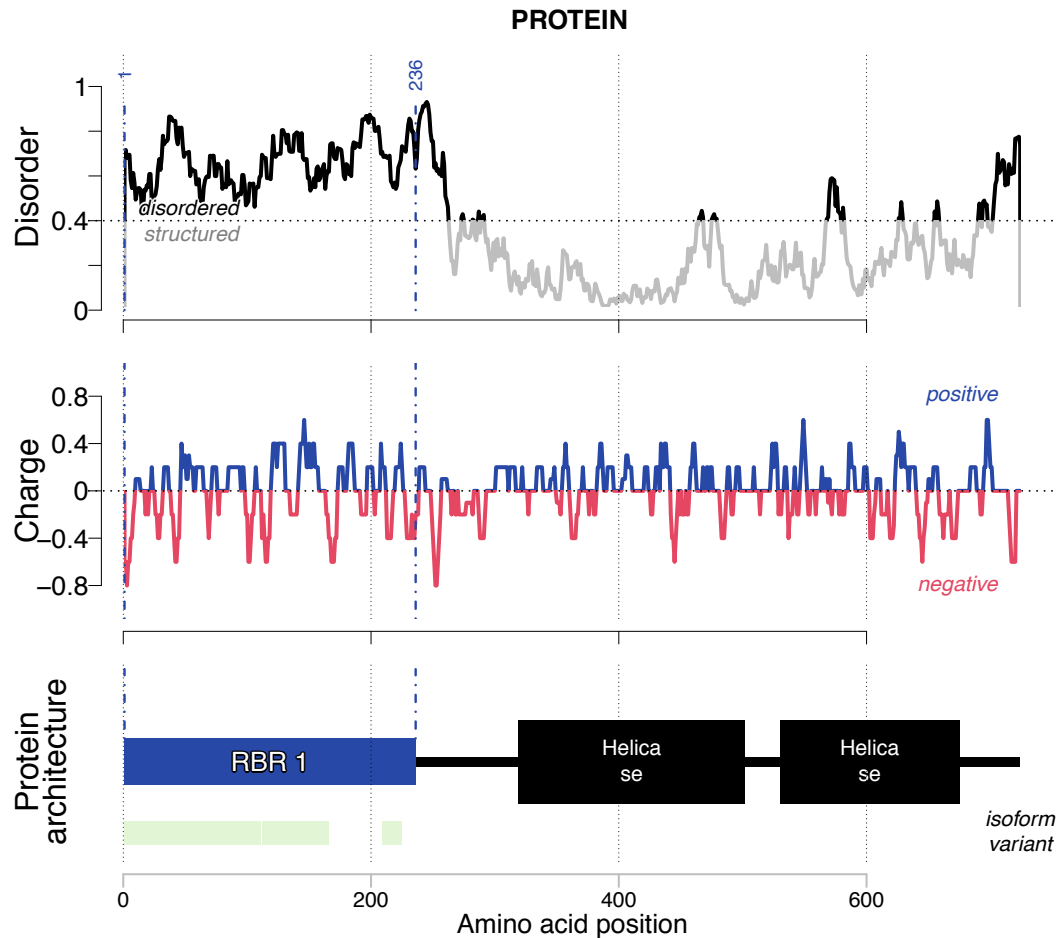

## RNA BINDING DISORDERED PEPTIDE

### RBR 1

1 MGD<sup>1</sup>ED<sup>2</sup>WE<sup>3</sup>AE<sup>4</sup>I<sup>5</sup>N<sup>6</sup>PH<sup>7</sup>M<sup>8</sup>SS<sup>9</sup>Y<sup>10</sup>VP<sup>11</sup>I<sup>12</sup>FE<sup>13</sup>K<sup>14</sup>DR<sup>15</sup>YS<sup>16</sup>GEN<sup>17</sup>GD<sup>18</sup>N<sup>19</sup>FR<sup>20</sup>T<sup>21</sup>P<sup>22</sup>ASS<sup>23</sup>SEM<sup>24</sup>DD<sup>25</sup>GG<sup>26</sup>PS<sup>27</sup>RR<sup>28</sup>D<sup>29</sup>H<sup>30</sup>FM<sup>31</sup>KS<sup>32</sup>GF<sup>33</sup>FA<sup>34</sup>  
S<sup>35</sup>GR<sup>36</sup>N<sup>37</sup>FG<sup>38</sup>NR<sup>39</sup>D<sup>40</sup>AGE<sup>41</sup>C<sup>42</sup>N<sup>43</sup>K<sup>44</sup>R<sup>45</sup>D<sup>46</sup>N<sup>47</sup>T<sup>48</sup>ST<sup>49</sup>M<sup>50</sup>GG<sup>51</sup>FG<sup>52</sup>V<sup>53</sup>G<sup>54</sup>KS<sup>55</sup>FG<sup>56</sup>NR<sup>57</sup>GF<sup>58</sup>SN<sup>59</sup>SR<sup>60</sup>F<sup>61</sup>ED<sup>62</sup>GD<sup>63</sup>SS<sup>64</sup>GF<sup>65</sup>WR<sup>66</sup>ESS<sup>67</sup>ND<sup>68</sup>CD<sup>69</sup>EN<sup>70</sup>  
P<sup>71</sup>TR<sup>72</sup>NR<sup>73</sup>GF<sup>74</sup>SK<sup>75</sup>R<sup>76</sup>GG<sup>77</sup>Y<sup>78</sup>RD<sup>79</sup>GN<sup>80</sup>NSE<sup>81</sup>AS<sup>82</sup>GP<sup>83</sup>Y<sup>84</sup>RR<sup>85</sup>GG<sup>86</sup>RS<sup>87</sup>FR<sup>88</sup>GC<sup>89</sup>RG<sup>90</sup>GF<sup>91</sup>LG<sup>92</sup>SP<sup>93</sup>NN<sup>94</sup>DL<sup>95</sup>DP<sup>96</sup>DEC<sup>97</sup>M<sup>98</sup>Q<sup>99</sup>RT<sup>100</sup>GG<sup>101</sup>  
L<sup>102</sup>FG<sup>103</sup>S<sup>104</sup>RR<sup>105</sup>P<sup>106</sup>V<sup>107</sup>LS<sup>108</sup>GT<sup>109</sup>G<sup>110</sup>NG<sup>111</sup>DT<sup>112</sup>S<sup>113</sup>Q<sup>114</sup>SR<sup>115</sup>SS<sup>116</sup>SG<sup>117</sup>S<sup>118</sup>ER<sup>119</sup>GG<sup>120</sup>Y<sup>121</sup>K<sup>122</sup>GL<sup>123</sup>NE<sup>124</sup>EV<sup>125</sup>I<sup>126</sup>T<sup>127</sup>G<sup>128</sup>SG<sup>129</sup>K<sup>130</sup>NS<sup>131</sup>WK<sup>132</sup>SE<sup>133</sup>A<sup>134</sup>EG<sup>135</sup>GES<sup>136</sup> 236

### GO biological processes

gene expression, male meiosis I, multicellular organismal development, piRNA metabolic process, regulation of protein localization, RNA secondary structure unwinding, sperm motility, spermatogenesis

### GO molecular functions

ATP binding, ATP-dependent RNA helicase activity, nucleic acid binding

### GO cellular compartments

chromatoid body, cytoplasm, nucleus, P granule, perinuclear region of cytoplasm, pi-body, piP-body

### Note:

Involved in assembly and maintenance of certain types of RNA granules. Nott et al. (2015) assessed Ddx4 binding to nucleotides using single and double stranded DNA. The sequence may bind RNA in a similar manner. GF/GF repeats are common in this sequence. The disordered region drives formation of DDX4 granules, methylation destabilises these droplets.

# EWS

## RNA-binding protein EWS

EWS oncogene; Ewing sarcoma breakpoint region 1 protein  
(Q01844)

(Homo sapiens)

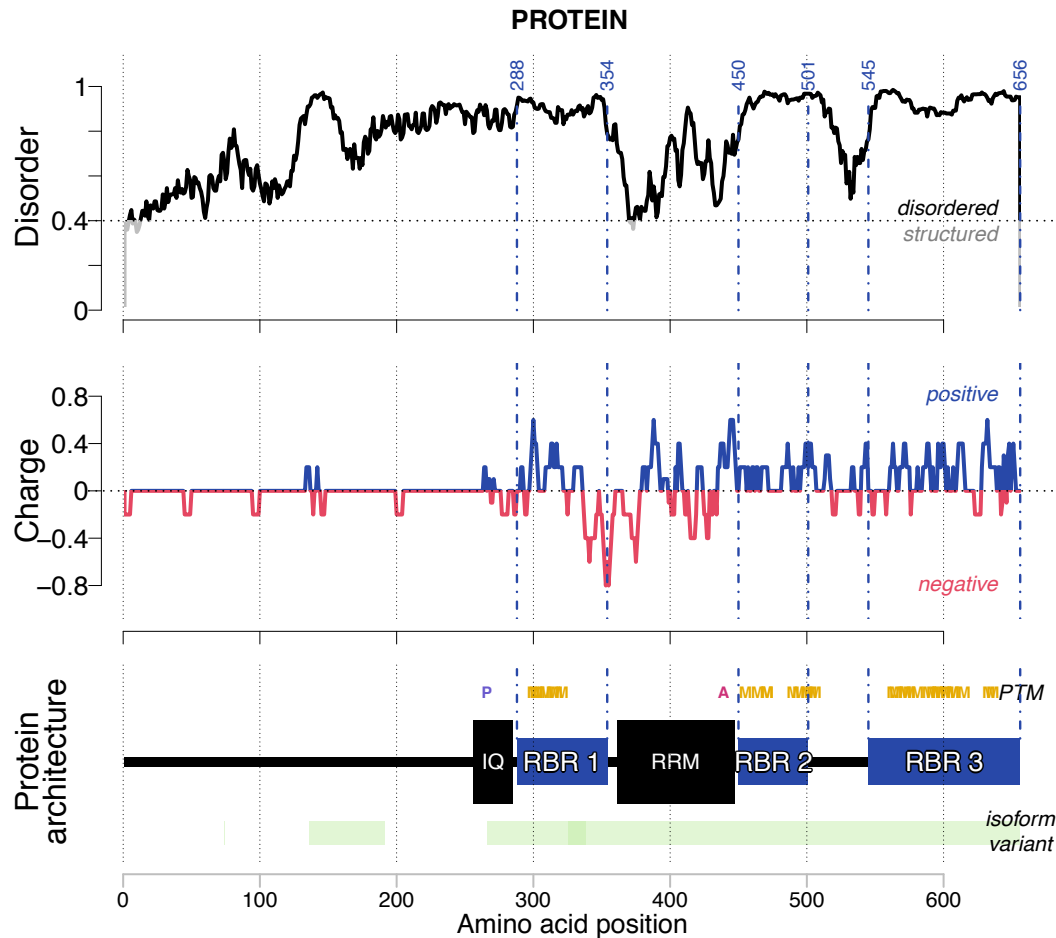

## RNA BINDING DISORDERED PEPTIDE

### RBR 1

288 PGENRSMGPDNRGRGRGGFDRGGMSRGGRRGGRRGGMGSAGERGGFNKPGGPMDEGPDLD  
LGPPVDP<sup>354</sup>

### RBR 2

450 PMNSMRGGLPPREGRGMPPLRGGPPGGPPGGPMGRMGRRGGDRGGFPPRG<sup>501</sup>

### RBR 3

545 APKPEGFLPPPFPPPGGDRGRGGPGGMRGGRRGLMDRGGPPGMFRGRRGGDRGGFRGGRG  
MDRGGFGGRRGGPPGGLMEQMGGRRGGRRGGPKMDKGEHRQERRDRPY<sup>656</sup>

## GO biological processes

regulation of transcription, DNA-templated, transcription, DNA-templated

## GO molecular functions

identical protein binding, nucleotide binding, poly(A) RNA binding, RNA binding, zinc ion binding

## GO cellular compartments

cytoplasm, nucleolus, nucleoplasm, nucleus, plasma membrane

### Note:

Regulates FAS/CD95-mediated apoptosis. Note that PG/G is also common in RGG2 and RGG3.

# FMRP

## Fragile X mental retardation protein 1

(Q06787)

(Homo sapiens)

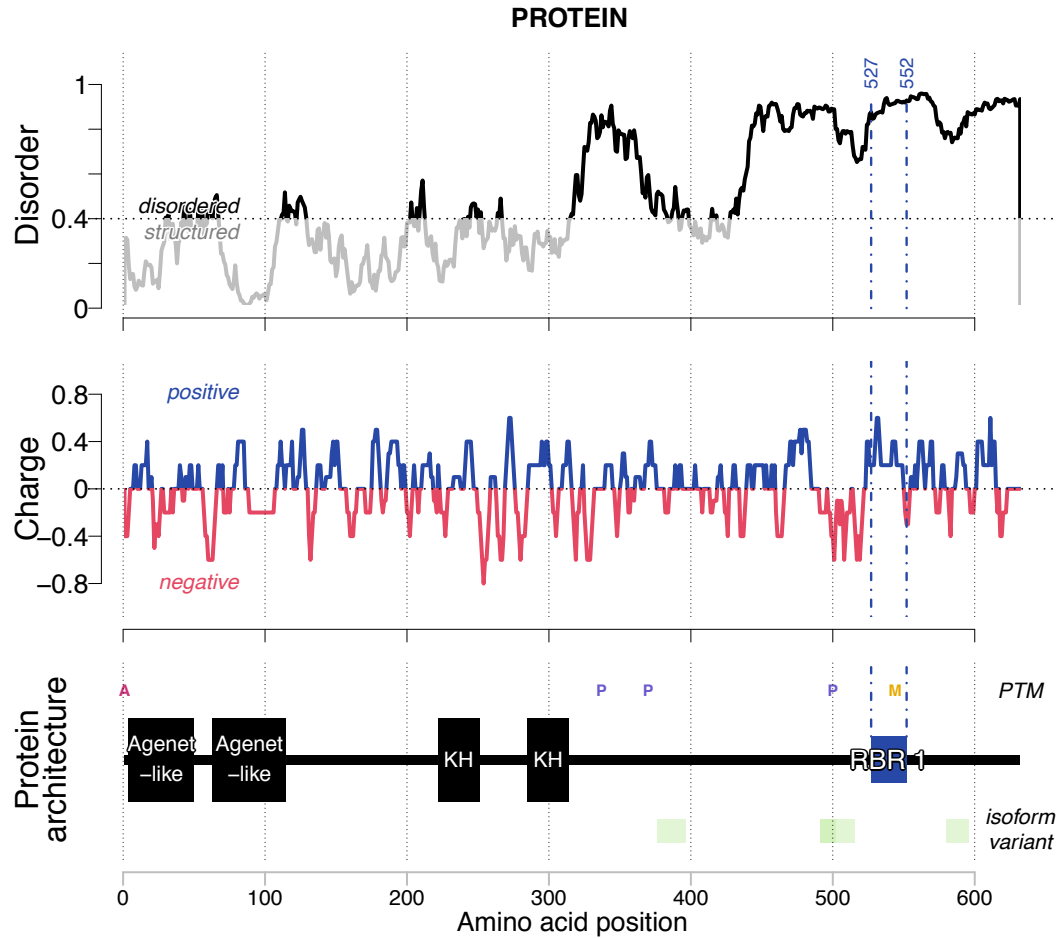

## RNA BINDING DISORDERED PEPTIDE

### RBR 1

527 RRGDGRRRGGGGRRGQGGRRGRGGGFKG 552

### GO biological processes

central nervous system development, mRNA transport, negative regulation of translation, negative regulation of translational initiation

### GO molecular functions

mRNA binding, poly(A) RNA binding, RNA binding

### GO cellular compartments

cytoplasm, cytoplasmic ribonucleoprotein granule, cytoplasmic stress granule, dendrite, membrane, mRNA cap binding complex, nucleolus, nucleoplasm, nucleus, polysome

**Note:** Different arginines are involved in contact with different RNAs. Central part of the RGG box may form a beta-turn. Target RNA may retain structural flexibility. Altered expression of this protein can lead to fragile X syndrome, fragile X tremor/ataxia syndrome, premature ovarian failure 1, and autism.

# FUS

## RNA-binding protein FUS

75 kDa DNA-pairing protein; Oncogene FUS; Oncogene TLS; POMp75; Translocated in liposarcoma protein (P35637)

(Homo sapiens)

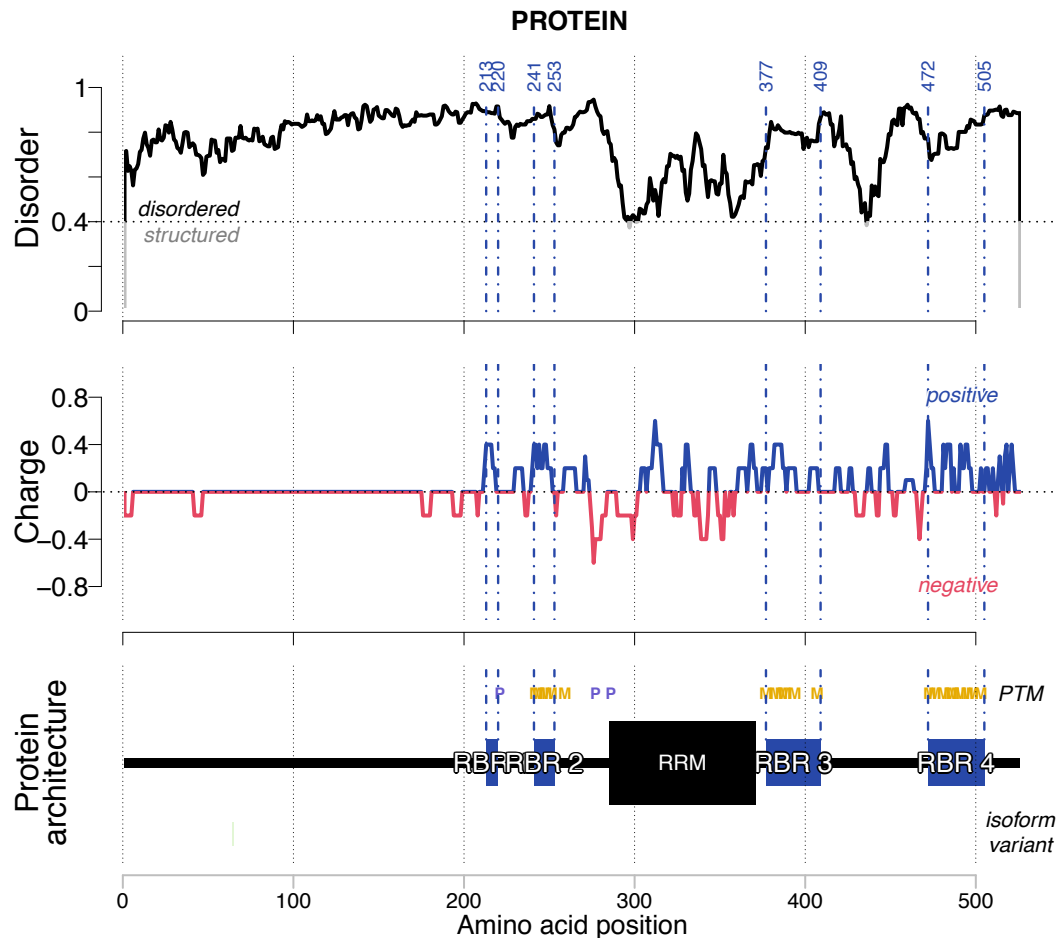

## RNA BINDING DISORDERED PEPTIDE

### RBR 1

213 RGGRRGG 220

### RBR 2

241 PRGRGGRRGG 253

### RBR 3

377 RGGNGRGGRRGGPMGRGGYGGGSGGGGRGG 409

### RBR 4

472 RRGGRRGGYDRGGYRGGDRGGFRGGRRGGDRGG 505

## GO biological processes

cellular response to calcium ion, gene expression, mRNA splicing, via spliceosome, regulation of nucleic acid-templated transcription, RNA splicing

## GO functions and cellular compartments

FUNCTIONS:DNA binding, identical protein binding, nucleotide binding, poly(A) RNA binding, RNA binding, transcription coactivator activity, zinc ion binding. COMPARTMENTS:dendritic spine head, nucleoplasm, nucleus, perikaryon, perinuclear region of cytoplasm, polysome.

### Note:

The highlighted RG-regions are estimates as specific sequence information could not be retrieved from original publications. This gene is linked to amyotrophic lateral sclerosis and frontotemporal lobar degeneration.

# hnRNPU

## Heterogeneous nuclear ribonucleoprotein U

Scaffold attachment factor A; p120; pp120  
(Q00839)

(Homo sapiens)

### PROTEIN

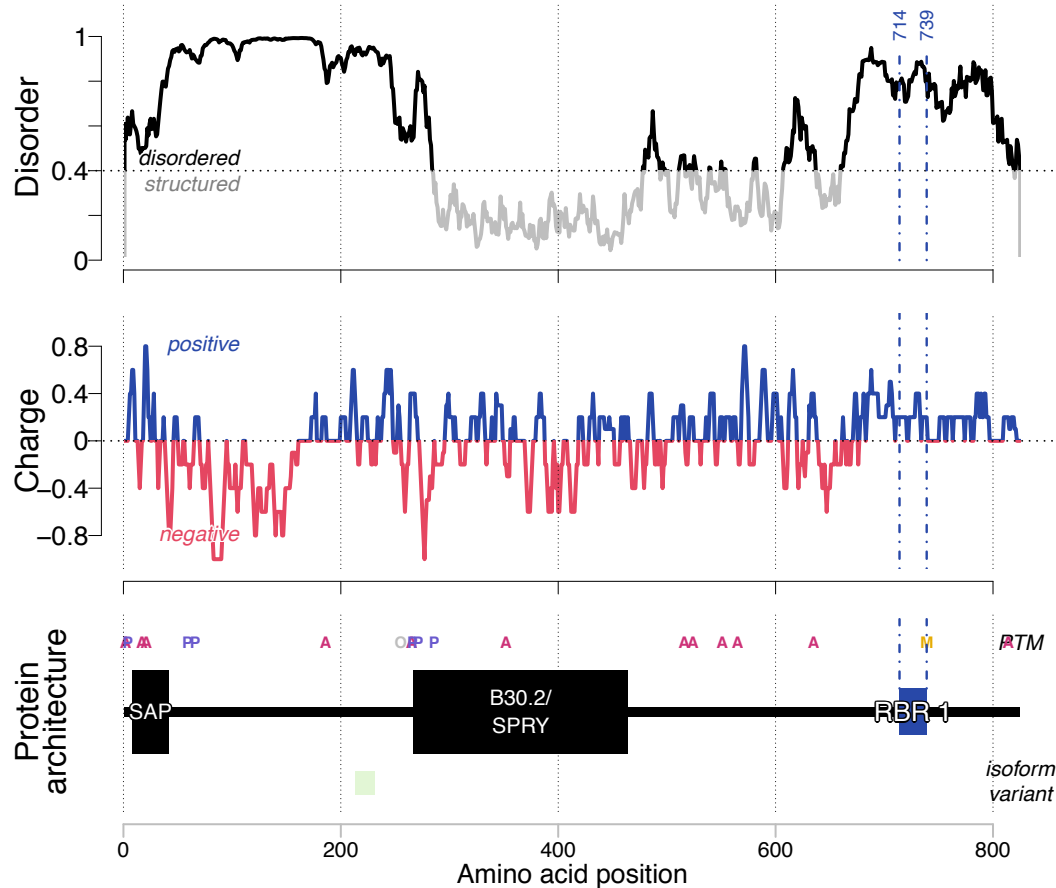

### RNA BINDING DISORDERED PEPTIDE

#### RBR 1

714MRGGNFRGGAPGNRGGYNRRGNMPQR739

#### GO biological processes

circadian regulation of gene expression, CRD-mediated mRNA stabilization, gene expression, mRNA splicing, via spliceosome, osteoblast differentiation, RNA processing, RNA splicing

#### GO molecular functions

ATP binding, core promoter binding, DNA binding, poly(A) RNA binding, RNA binding

#### GO cellular compartments

catalytic step 2 spliceosome, cell surface, CRD-mediated mRNA stability complex, cytoplasmic ribonucleoprotein granule, membrane, nucleoplasm, nucleus, ribonucleoprotein complex

# ICP27

## mRNA export factor

Immediate-early protein IE63; Infected cell protein 27; VMW63  
(P10238)

(Human herpesvirus 1 (strain 17))

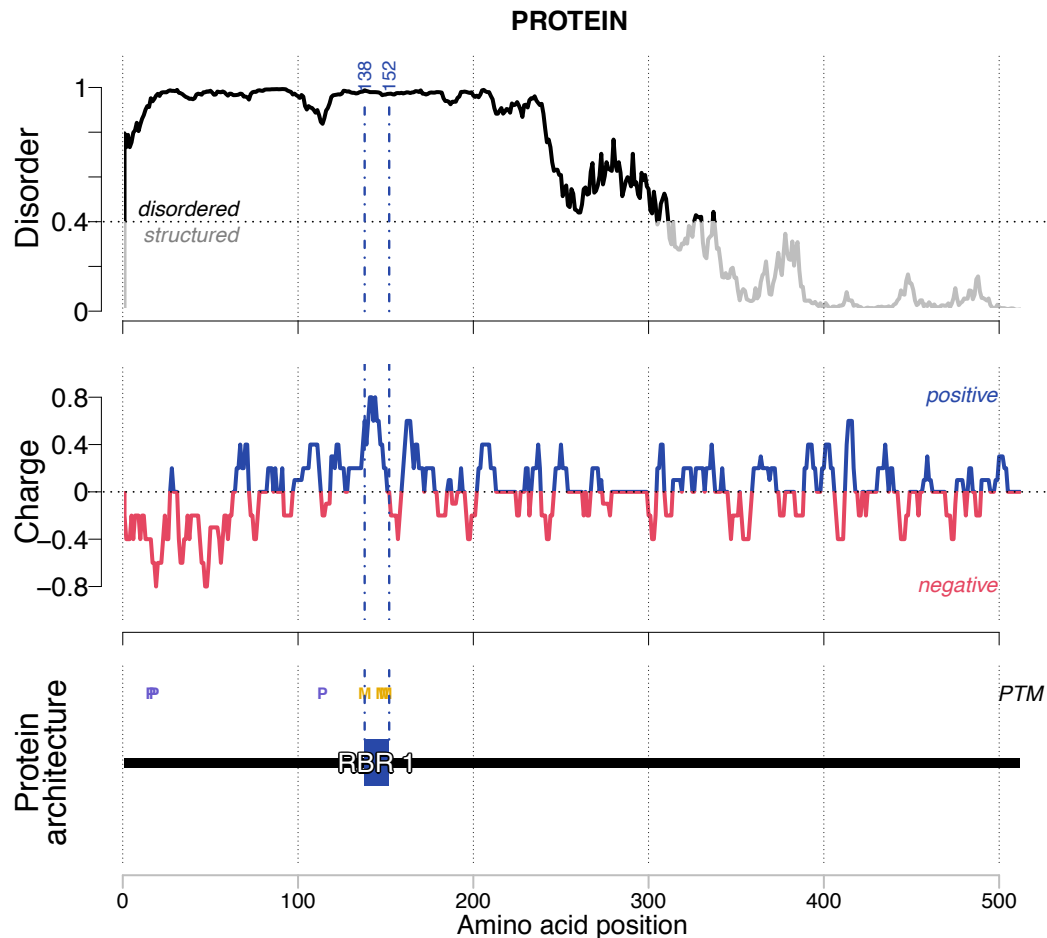

## RNA BINDING DISORDERED PEPTIDE

### RBR 1

138 RGGRRRGRGRGG 152

### GO biological processes

activation by virus of host NF- $\kappa$ B transcription factor activity, modulation by virus of host G1/S transition checkpoint, suppression by virus of host mRNA processing, transcription, DNA-templated

### GO molecular functions

metal ion binding, RNA binding

### GO cellular compartments

host cell cytoplasm, host cell nucleus

### Note:

Remains unstructured when bound to RNA.

# LAF1

## LAF-1, isoform b; Putative DEAD-box RNA helicase

(D0PV95)

(Caenorhabditis elegans)

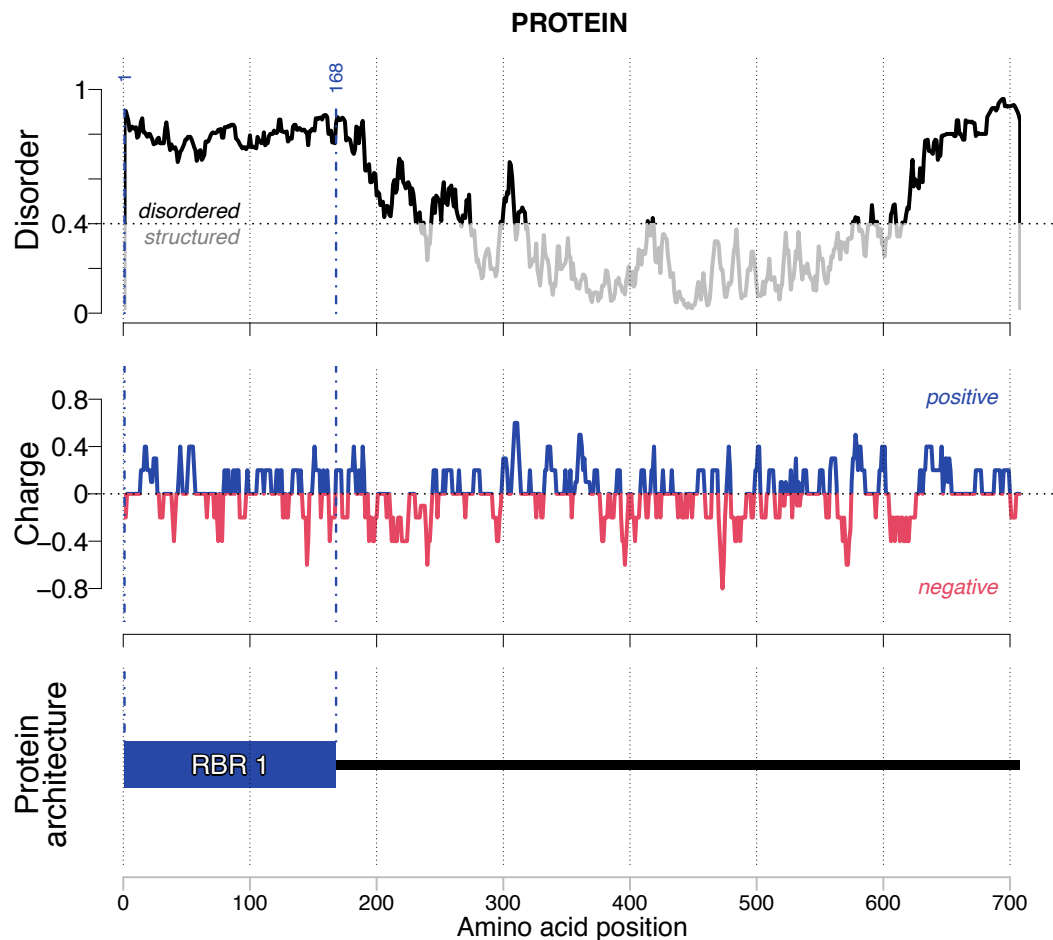

## RNA BINDING DISORDERED PEPTIDE

### RBR 1

1 MESNQSNNGGSGNAALNRGGRYVPPHLRGGDGGAAAAASAGGDDRRGGAGGGGYRRGGGN  
 SGGGGGGGYDRGYNDNRDDRDRNGSSGGYGRDRNYEDRGYNGGGGGGGNRYNNNRGGGG  
 GGYNRQDRGDGGSSNFSRGGYNNRDEGSDNRGSGRSYNNDRRDNGGDDG<sup>168</sup>

### GO biological processes

chromosome segregation, regulation of gene expression, RNA secondary structure unwinding, translational initiation

### GO molecular functions

ATP binding, ATP-dependent RNA helicase activity, nucleic acid binding

### GO cellular compartments

cytoplasm, P granule

### Note:

The RNA binding, N-terminal region is also necessary and sufficient for formation of LAF-1 RNA granules. Note that GY and SS pairs are common in this sequence, as are stretches of G.



# NXF1

## Nuclear RNA export factor 1

Tip-associated protein; Tip-associating protein; mRNA export factor TAP  
(Q9UBU9)

(Homo sapiens)

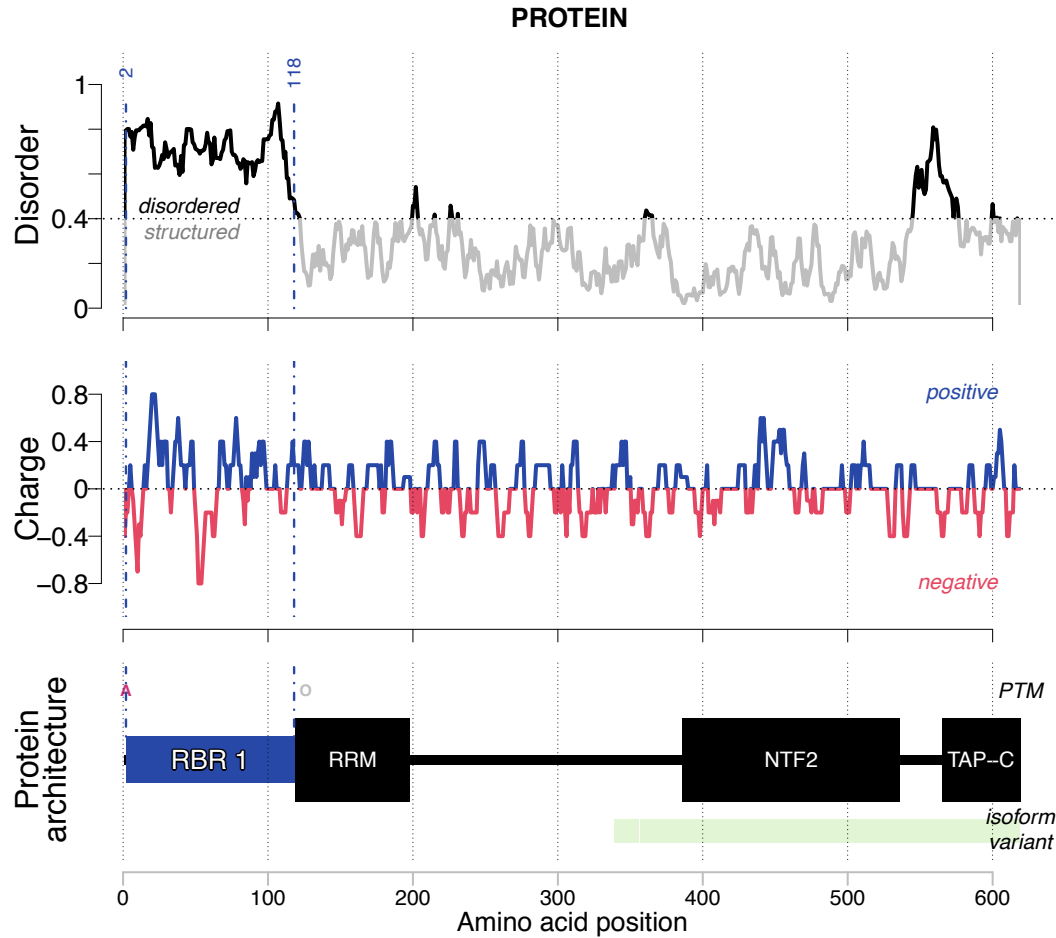

## RNA BINDING DISORDERED PEPTIDE

### RBR 1

2 ADEGKSYSEHDDERLVNFPQRKKKGRGPFWRWKYEGNRRSRGGSGIRSSRLEEDDGDVAM  
SDAQDGRVRYNPLYTTRPNRRGDTWHD RDRIHVTVRRDRAPPERGGAGTSQDGTSKN<sup>118</sup>

### GO biological processes

gene expression, mRNA export from nucleus, viral process

### GO molecular functions

nucleotide binding, poly(A) RNA binding, single-stranded RNA binding

### GO cellular compartments

cytosol, nuclear speck, nucleoplasm, nucleus

### Note:

The disordered RNA binding region is further divided into N-terminal 'minor RNA binding' and C-terminal 'major RNA binding' regions. Mutations of 10 Args in major region drastically reduces RNA binding.

# Nucleolin

## Nucleolin

Protein C23  
(P08199)

(*Mesocricetus auratus*)

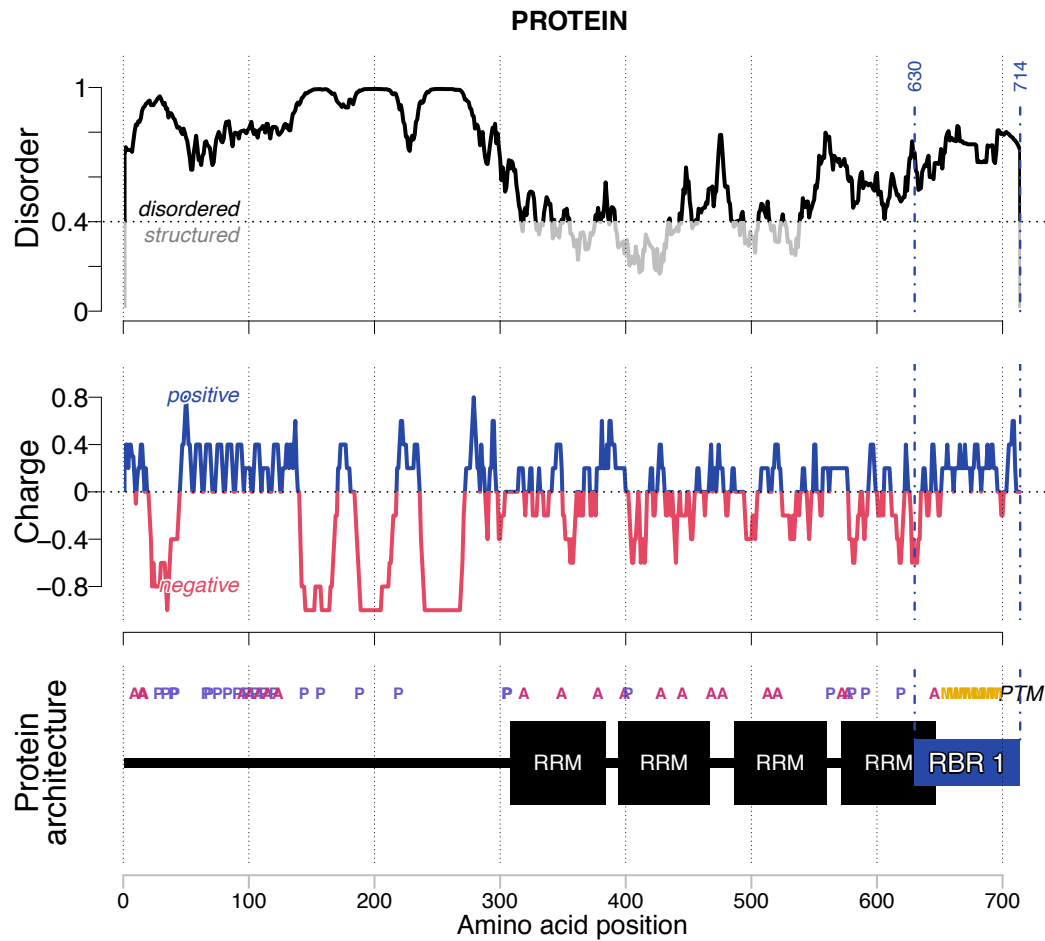

## RNA BINDING DISORDERED PEPTIDE

### RBR 1

630 MEDGE I DGNKVTLDWAKPKGEGGFGGRRGGGRGGFGGRRGGGRGGGRGGFGGRRGGFGGRG  
GFRGGRGGGGGGDFK PQGKKTKE 714

GO biological processes

GO molecular functions

nucleotide binding, RNA binding, telomeric DNA binding

GO cellular compartments

cytoplasm, nucleolus, ribonucleoprotein complex

# RBMX

**RNA-binding motif protein, X chromosome**  
Glycoprotein p43; Heterogeneous nuclear ribonucleoprotein G  
(P38159)  
(Homo sapiens)

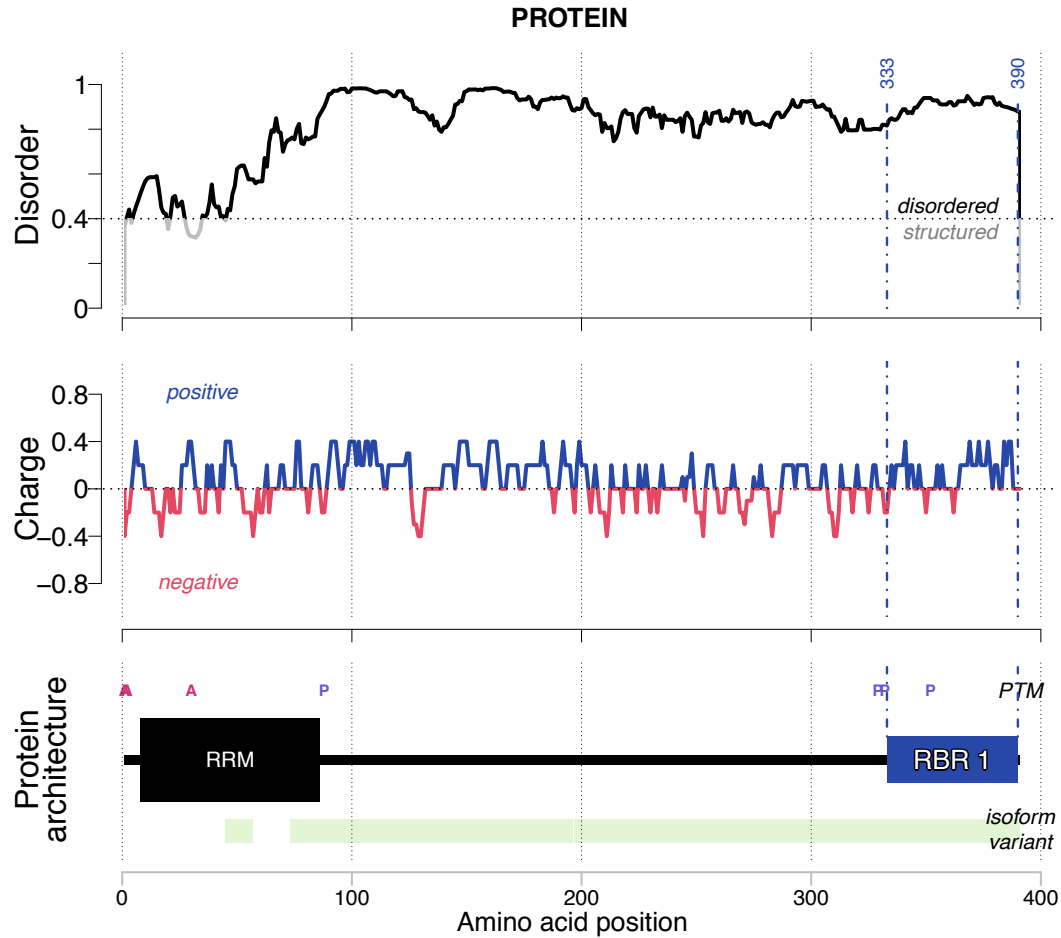

## RNA BINDING DISORDERED PEPTIDE

**RBR 1**  
333 **DLYSSGRDRVGRQERGLPPSMERGYPPPRDSYSSSSRGA** **PRGGGRGGSRSDRGGGRSR** 390

### GO biological processes

cellular response to interleukin-1, gene expression, membrane protein ectodomain proteolysis, mRNA splice site selection, mRNA splicing, via spliceosome, negative regulation of mRNA A splicing, via spliceosome, osteoblast differentiation, positive regulation of mRNA splicing, via spliceosome, positive regulation of transcription from RNA polymerase II promoter...

### GO molecular functions

chromatin binding, core promoter binding, mRNA binding, nucleotide binding, poly(A) RNA binding, RNA binding, single-stranded RNA binding

### GO cellular compartments

catalytic step 2 spliceosome, extracellular exosome, extracellular space, membrane, nuclear euchromatin, nucleoplasm, nucleus, ribonucleoprotein complex, supraspliceosomal complex

### Note:

This protein is necessary for neural and muscle development in *Xenopus* and essential for brain development in zebrafish. It is required for resistance to DNA damage in human cell lines. May be linked with intellectual disability syndrome in humans.

# Foamy virus Gag

Gag protein

(Q98826)

(Human foamy virus)

## PROTEIN

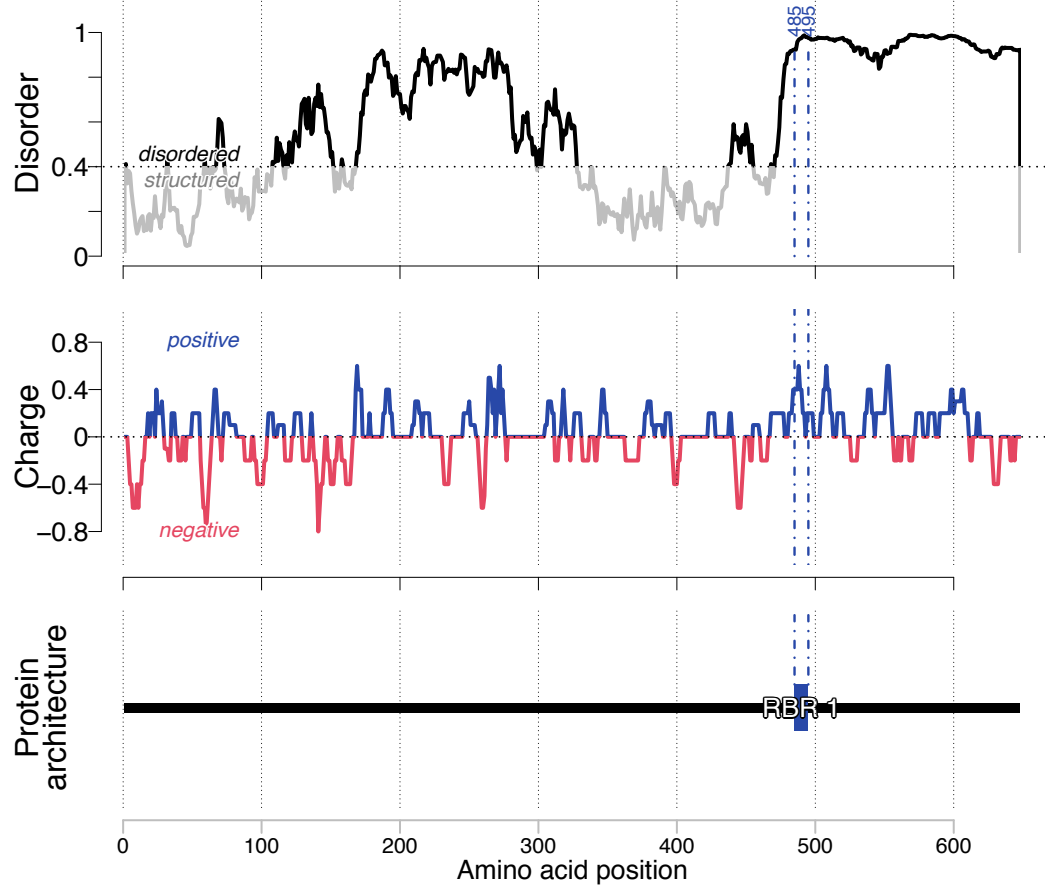

## RNA BINDING DISORDERED PEPTIDE

### RBR 1

485 R P S R G R G R G Q N 495

### GO biological processes

microtubule-dependent intracellular transport of viral material towards nucleus, viral entry into host cell, viral release from host cell

### GO molecular functions

-

### GO cellular compartments

host cell cytoplasm, host cell nucleus, host cytoskeleton, viral capsid

### Note:

This protein harbours 4 additional RG regions but they do not contribute to RNA binding in vitro. All three GR regions are required for viral genomic RNA packaging.

# TERF2

## Telomeric repeat-binding factor 2

TTAGGG repeat-binding factor 2; Telomeric DNA-binding protein  
(Q15554)

(Homo sapiens)

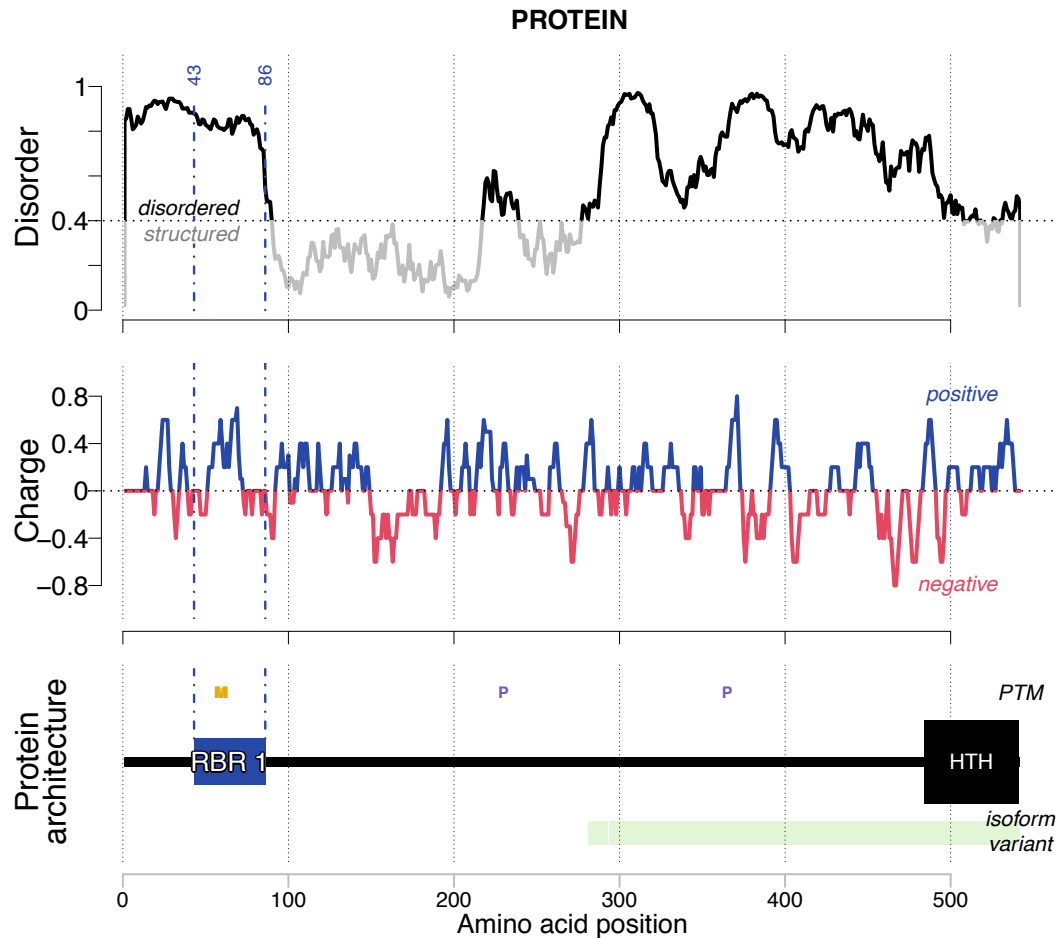

## RNA BINDING DISORDERED PEPTIDE

### RBR 1

43 **MAGGGGSSDGSGRRAAGRRASRRSSGRARRGRHEPGLGGPAERAG** 86

### GO biological processes

cell cycle, cellular senescence, in utero embryonic development, negative regulation of beta-galactosidase activity, negative regulation of cell aging, negative regulation of cellular senescence, negative regulation of gene expression, negative regulation of t-circle formation, negative regulation of telomere capping, negative regulation of telomere maintenance...

### GO molecular functions

double-stranded telomeric DNA binding, macromolecular complex binding, protein C-terminus binding, protein homodimerization activity, telomeric DNA binding

### GO cellular compartments

chromosome, telomeric region, cytoplasm, Golgi apparatus, male germ cell nucleus, nuclear chromosome, telomeric region, nuclear telomere cap complex, nucleoplasm, nucleus, telosome

### Note:

The isoform used in Zhang et al. (Nat Commun 2015; PMID: 26586091) is an N-terminally shortened (TRF2-S) version of the sequence displayed here. TRF2-S lacks the first 42 amino acids preceding the RNA-binding disordered region. As the short isoform is not annotated in UniProt at present, we display here the full protein.

**XTUT7**  
**TUT7/ZCCHC6**  
(R4IZH5)  
(Xenopus laevis)

**PROTEIN**

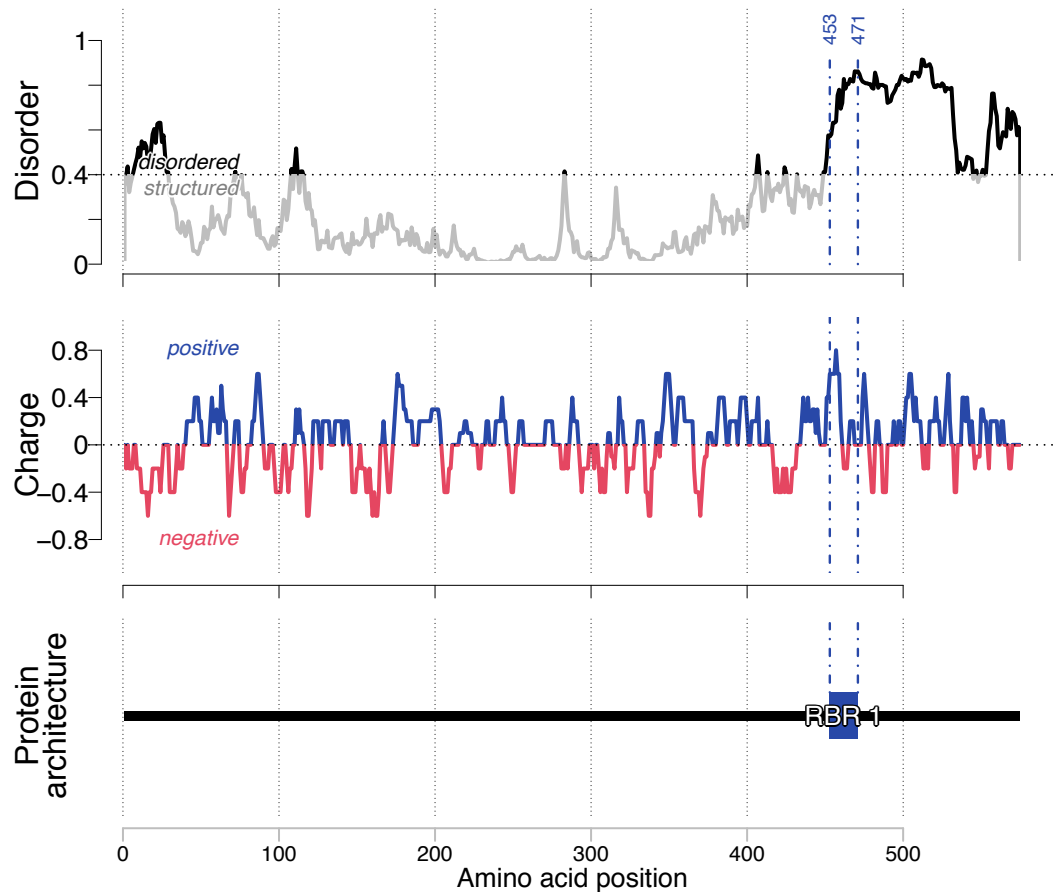

**RNA BINDING DISORDERED PEPTIDE**

**RBR 1**  
453 MRRNRVRRRNNEAGNQRY 471

GO biological processes

GO molecular functions

GO cellular compartments

# Tat

## Protein Tat

Transactivating regulatory protein  
(P04608)

(Human immunodeficiency virus type 1 group M subtype B (isolate HXB2))

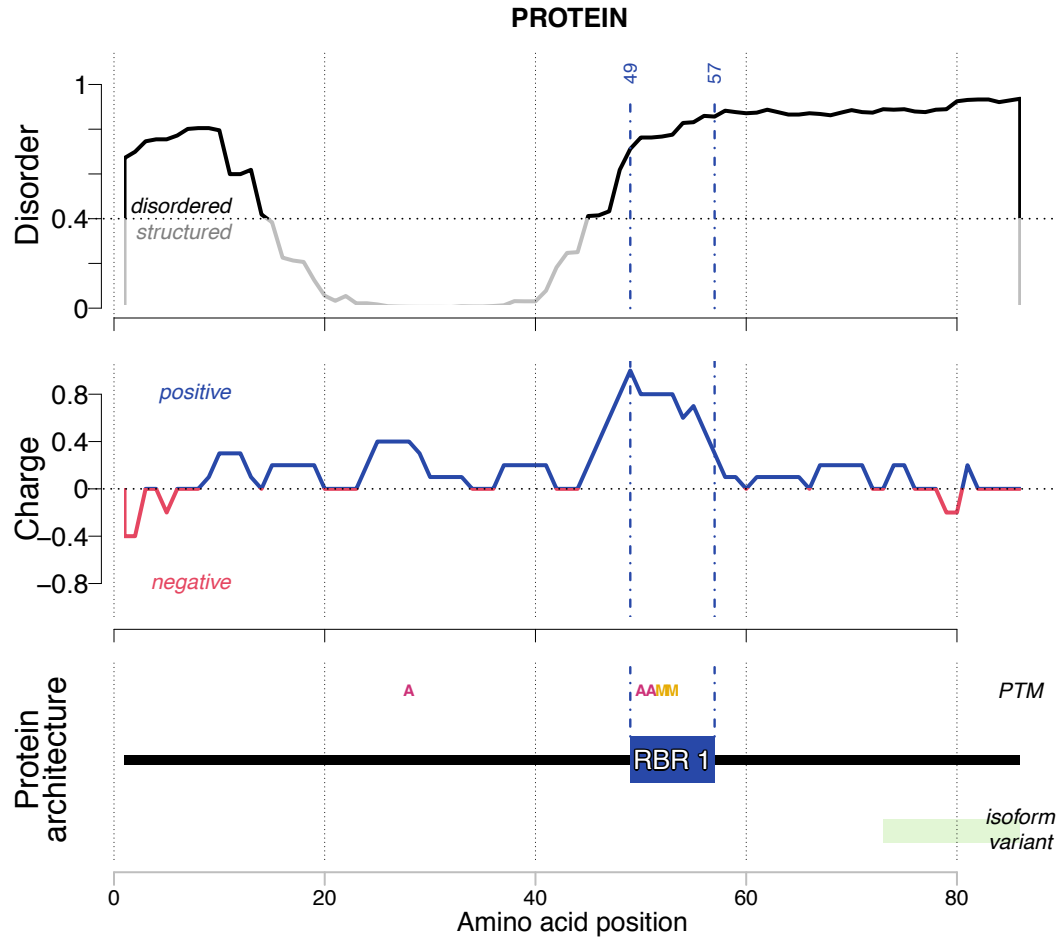

## RNA BINDING DISORDERED PEPTIDE

### RBR 1

49 **RKKRRQRRR** 57

### GO biological processes

apoptotic process, modulation by virus of host chromatin organization, modulation by virus of host PP1 activity, positive regulation of viral transcription, suppression by virus of host type I interferon-mediated signaling pathway, transcription, DNA-templated, viral process

### GO molecular functions

actinin binding, metal ion binding, RNA binding, sequence-specific DNA binding transcription factor activity

### GO cellular compartments

extracellular region, host cell cytoplasm, host cell nucleolus, host cell nucleus

### Note:

Remains flexible when bound to target RNA (TAR). The RNA-binding region overlaps with the nuclear localisation signal.

# Rev

## Protein Rev

ART/TRS; Anti-repression transactivator; Regulator of expression of viral proteins  
(P69718)

(Human immunodeficiency virus type 1 group M subtype B (isolate HXB3))

### PROTEIN

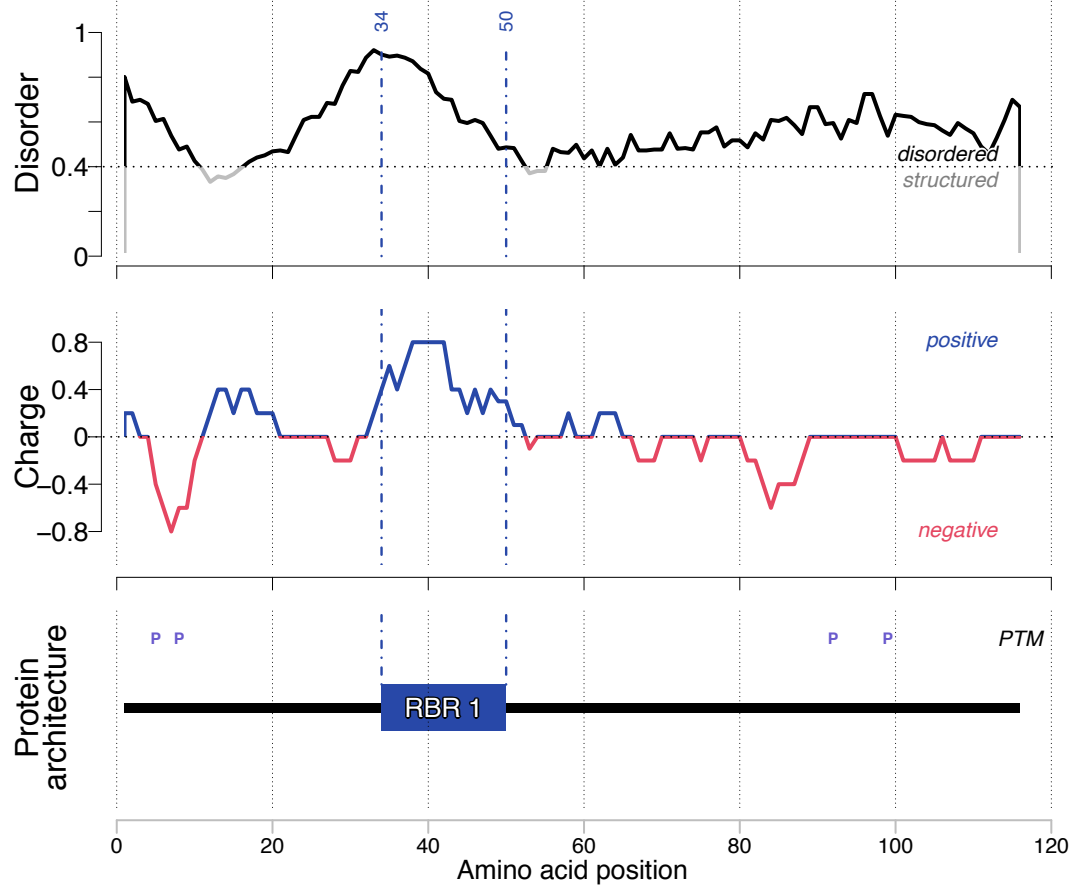

### RNA BINDING DISORDERED PEPTIDE

#### RBR 1

<sup>34</sup> TRQA RRRNRRRRRWRERQR <sup>50</sup>

#### GO biological processes

mRNA transport, viral process

#### GO molecular functions

RNA binding, sequence-specific DNA binding transcription factor activity

#### GO cellular compartments

host cell cytoplasm, host cell nucleolus

#### Note:

Forms an alpha-helical structured when RNA-bound, but retains some structural flexibility. Rev homomultimerises and forms a large Rev-RNA particle. Recent reports indicate also the target RNA (RRE) has structural flexibility. RNA-binding region overlaps with nuclear localisation signal.



# Tat

## Protein Tat

S ORF; Transactivating regulatory protein; bTat  
(P19564)

(Bovine immunodeficiency virus (strain R29))

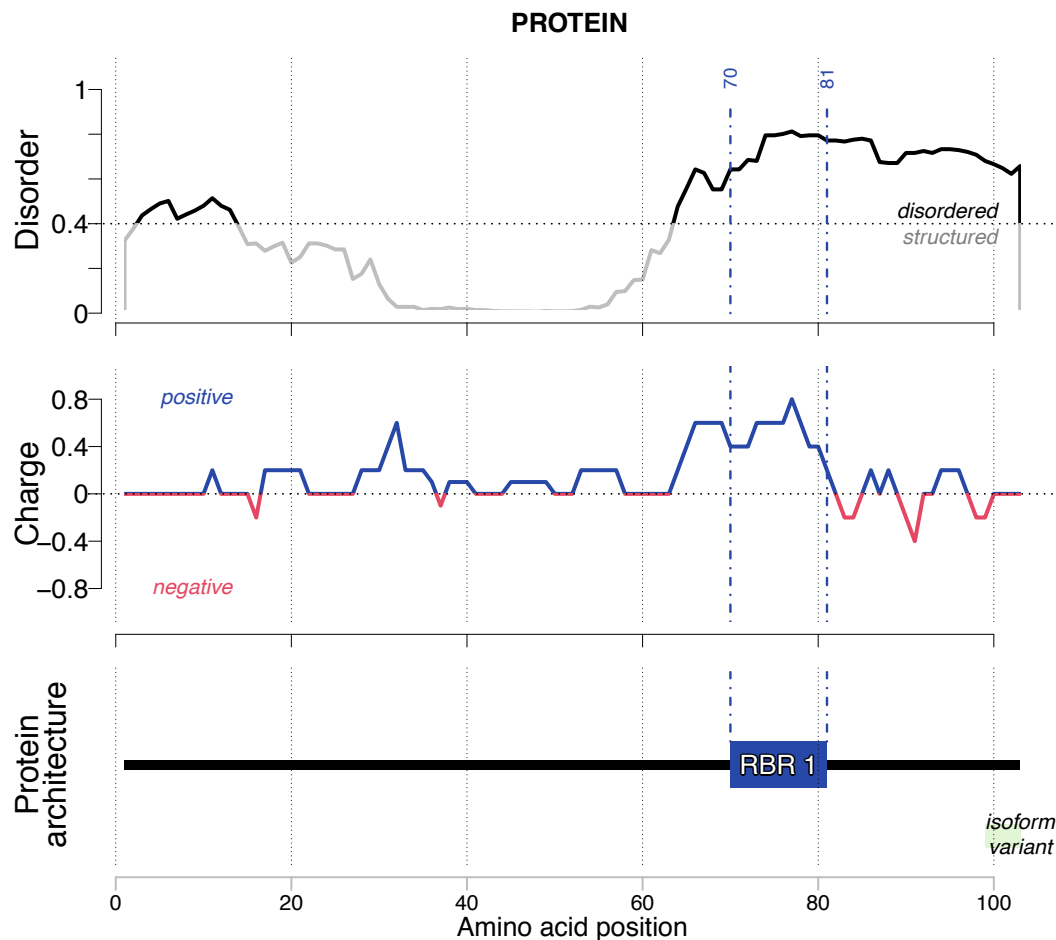

## RNA BINDING DISORDERED PEPTIDE

### RBR 1

70 **RGTRGKGR**R | RR 81

### GO biological processes

transcription, DNA-templated, viral process

### GO molecular functions

RNA binding, transcription factor activity, sequence-specific DNA binding

### GO cellular compartments

host cell nucleolus

# Coat protein

## Capsid protein

Coat protein  
(P03591)

(Alfalfa mosaic virus (strain 425 / isolate Leiden))

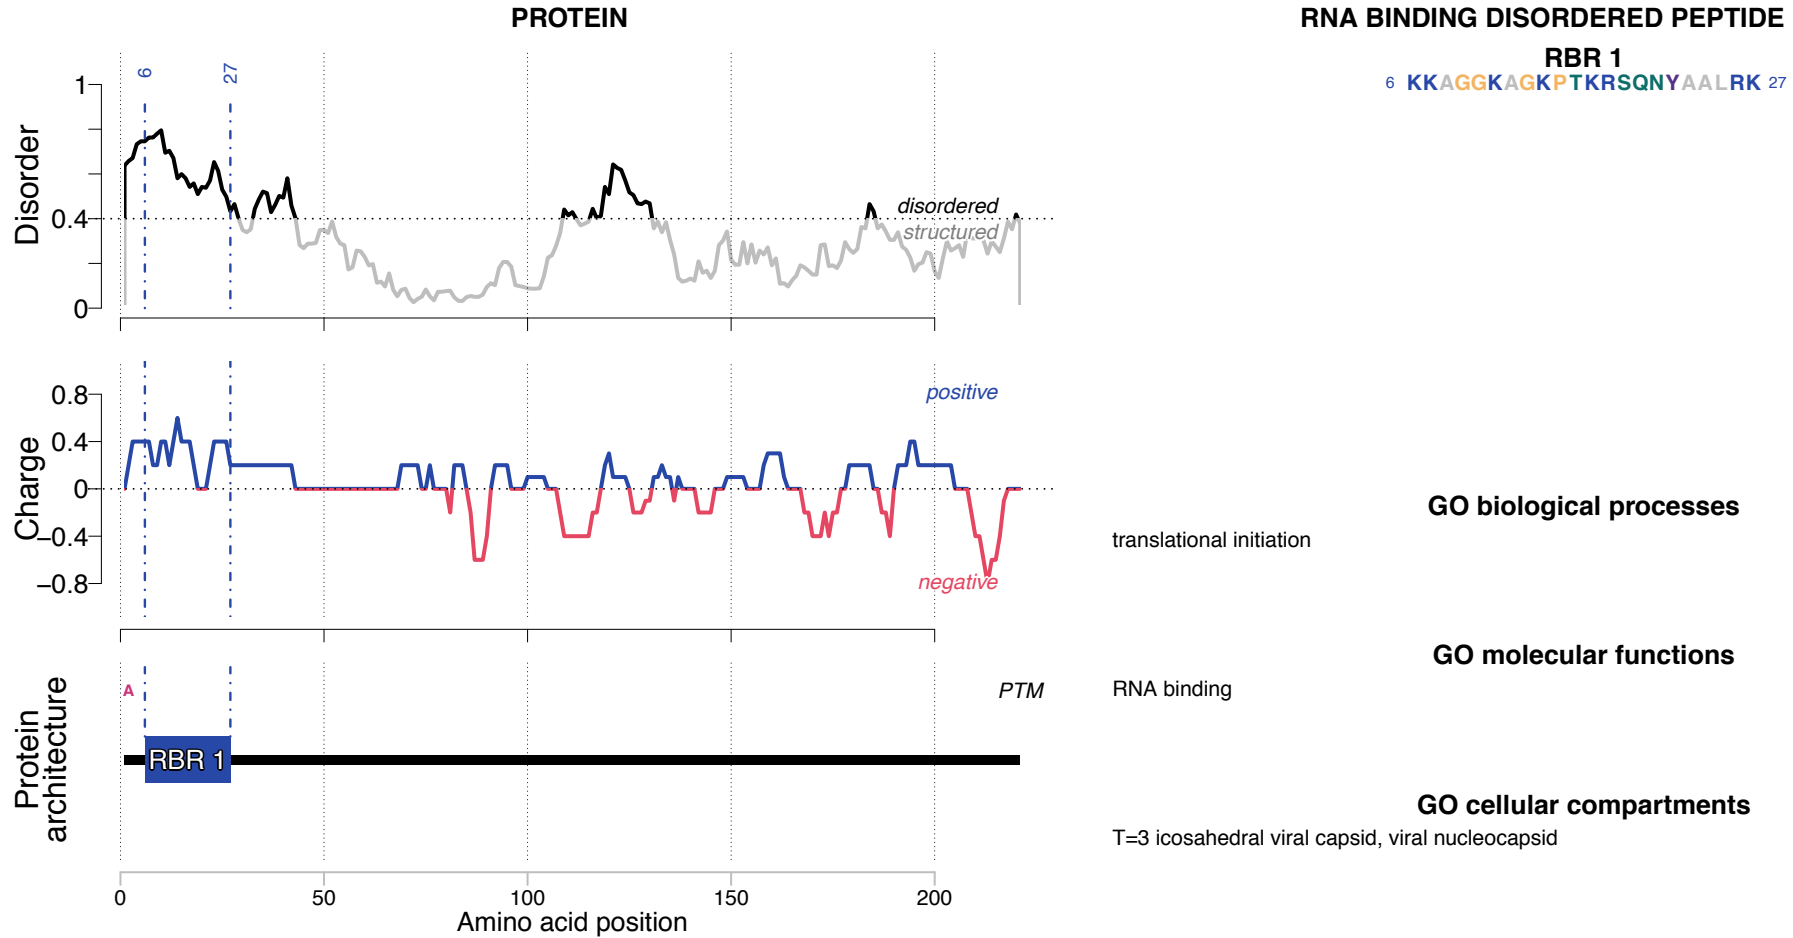

# PAPD5

## Non-canonical poly(A) RNA polymerase PAPD5

PAP-associated domain-containing protein 5; Terminal uridylyltransferase 3; Topoisomerase-related function protein 4-2 (Q8NDF8)

(Homo sapiens)

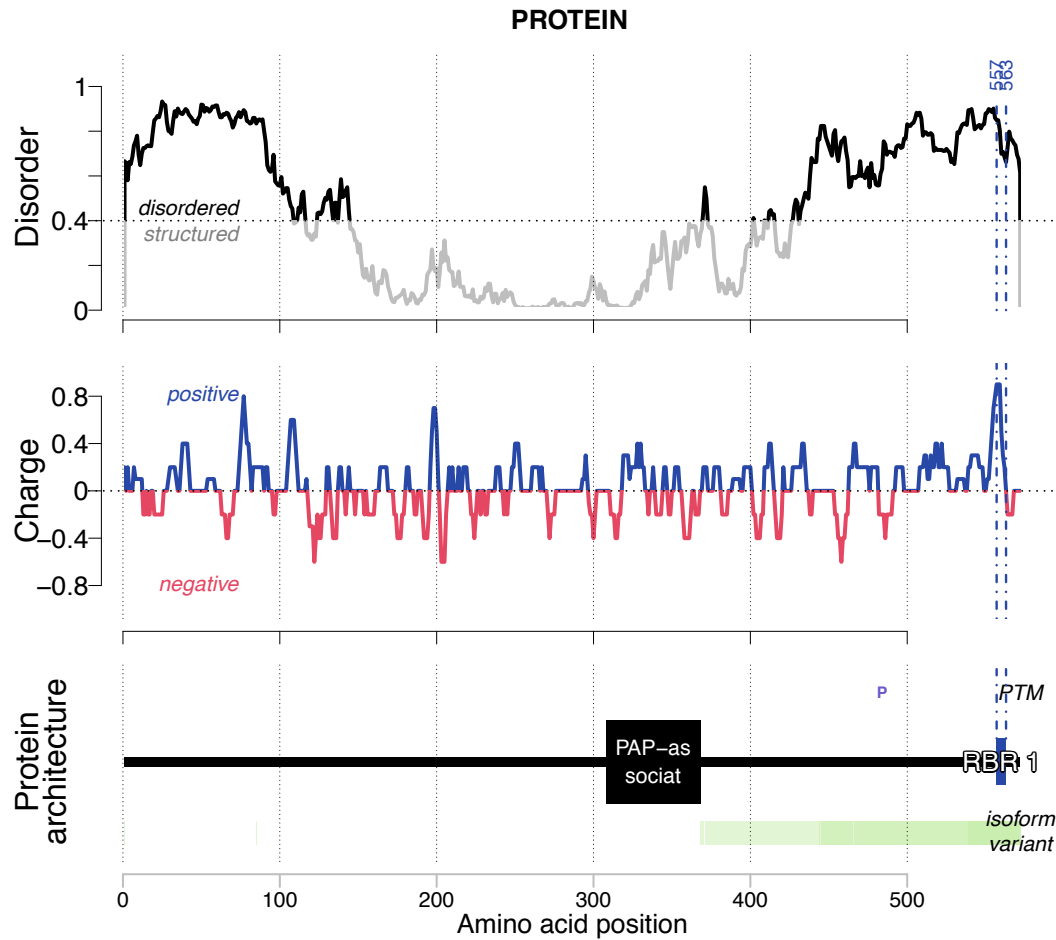

## RNA BINDING DISORDERED PEPTIDE

### RBR 1

557 **KKRKHKR** 563

### GO biological processes

cell division, histone mRNA catabolic process, mitotic nuclear division, mRNA processing, rRNA processing

### GO molecular functions

DNA binding, DNA-directed DNA polymerase activity, metal ion binding, poly(A) RNA binding, polynucleotide adenylyltransferase activity

### GO cellular compartments

cytoplasm, nucleolus

# SDAD1

## Protein SDA1 homolog

Nucleolar protein 130; SDA1 domain-containing protein 1  
(Q9NVU7)

(Homo sapiens)

### PROTEIN

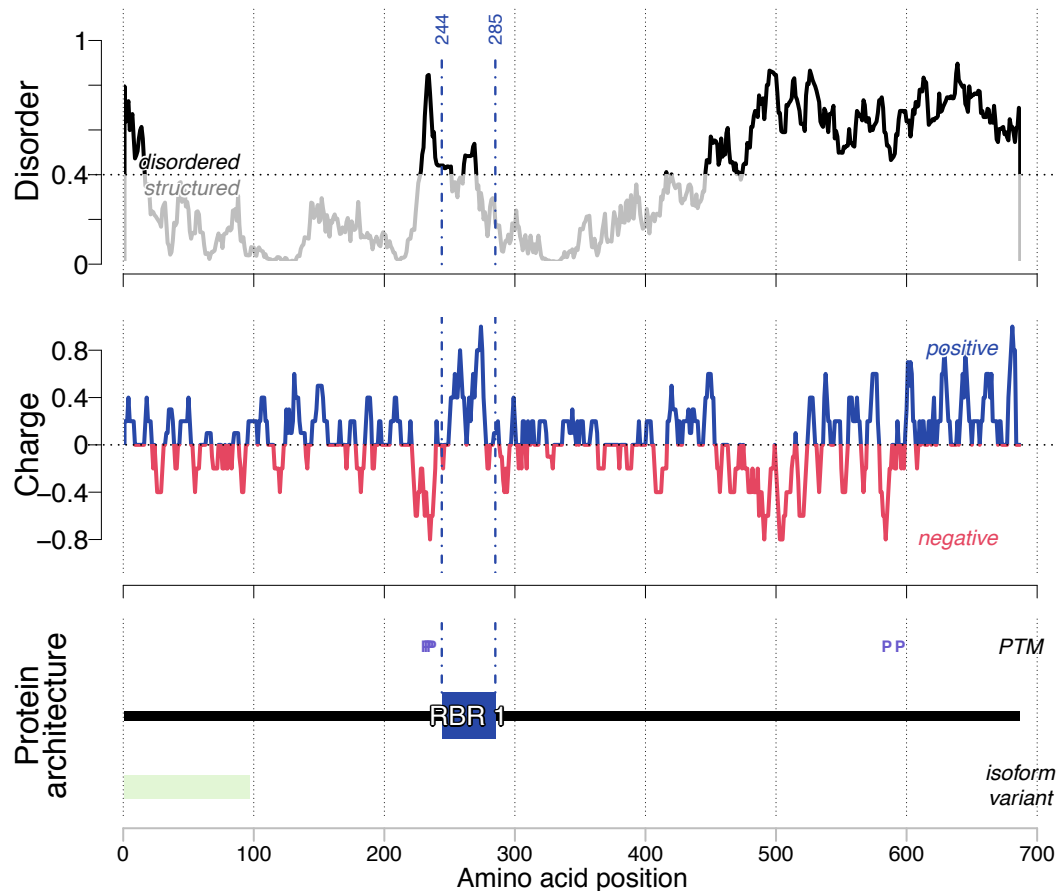

### RNA BINDING DISORDERED PEPTIDE

#### RBR 1

244 **R****D****L****L****V****Q****Y****A****T****G****K****K****S****S****K****N****K****K****L****E****K****A****M****K****V****L****K****K****Q****K****K****K****K****P****E****V****F****N****F****S** 285

#### GO biological processes

actin cytoskeleton organization, protein transport, ribosomal large subunit biogenesis, ribosomal large subunit export from nucleus

#### GO molecular functions

-

#### GO cellular compartments

nucleolus, nucleus

# HMGA1

## High mobility group protein HMG-I/HMG-Y

High mobility group AT-hook protein 1; High mobility group protein R  
(P17096)

(Homo sapiens)

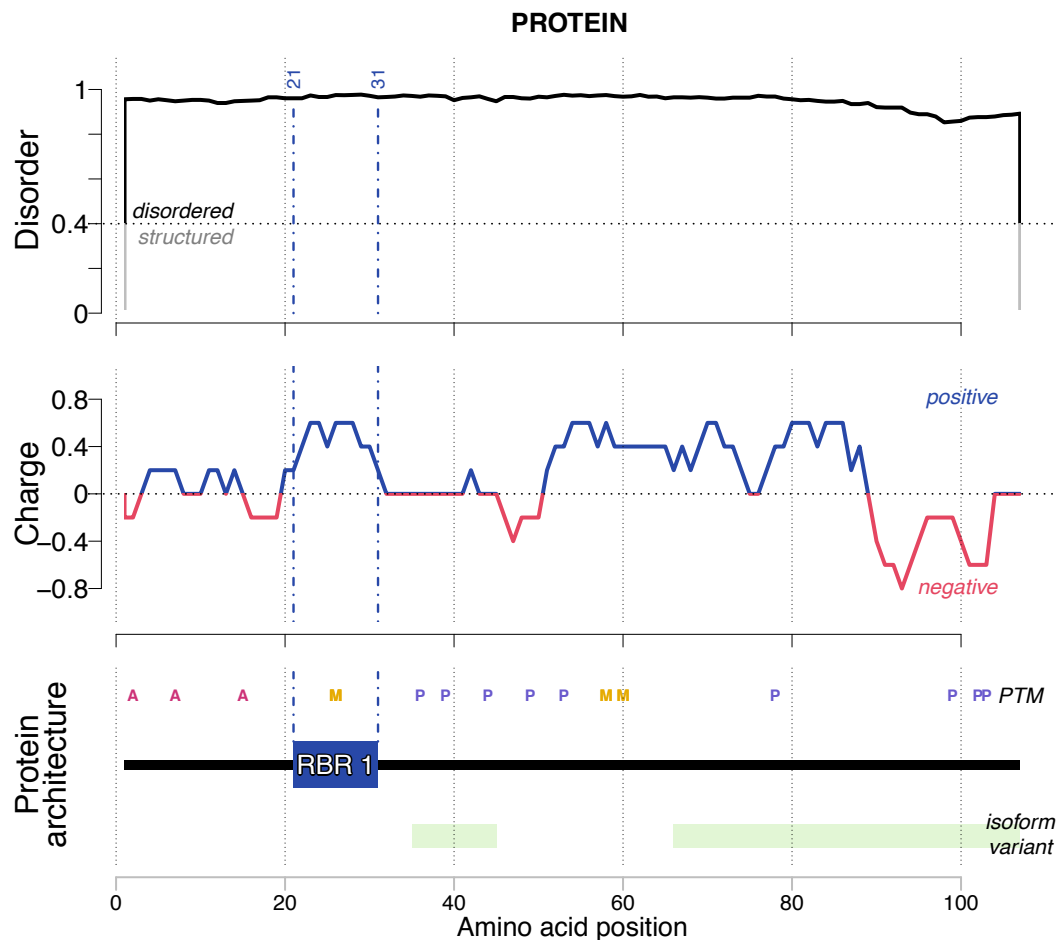

## RNA BINDING DISORDERED PEPTIDE

### RBR 1

21 TEKRGRGRPRK 31

### GO biological processes

base-excision repair, DNA unwinding involved in DNA replication, establishment of integrated proviral latency, negative regulation of cell proliferation, negative regulation of chromatin silencing, negative regulation of transcription, DNA-templated, nucleosome disassembly, oncogene-induced cell senescence, positive regulation of cellular senescence, positiv...

### GO molecular functions

5'-deoxyribose-5-phosphate lyase activity, AT DNA binding, chromatin binding, DNA binding, DNA-(apurinic or apyrimidinic site) lyase activity, enzyme binding, ligand-dependent nuclear receptor transcription coactivator activity, peroxisome proliferator activated receptor binding, retinoic acid receptor binding, retinoid X receptor binding, RNA polymerase II ...

### GO cellular compartments

cytosol, focal adhesion, nucleoplasm, nucleus, RNA polymerase II transcription factor complex, senescence-associated heterochromatin focus, transcription factor complex

### Note:

This protein has three (e)AT-hooks, the first one is shown to be RNA binding. Region becomes structured when bound to DNA.

# Tip5

## Bromodomain adjacent to zinc finger domain protein 2A

Transcription termination factor I-interacting protein 5; hWALp3  
(Q9UIF9)

(Homo sapiens)

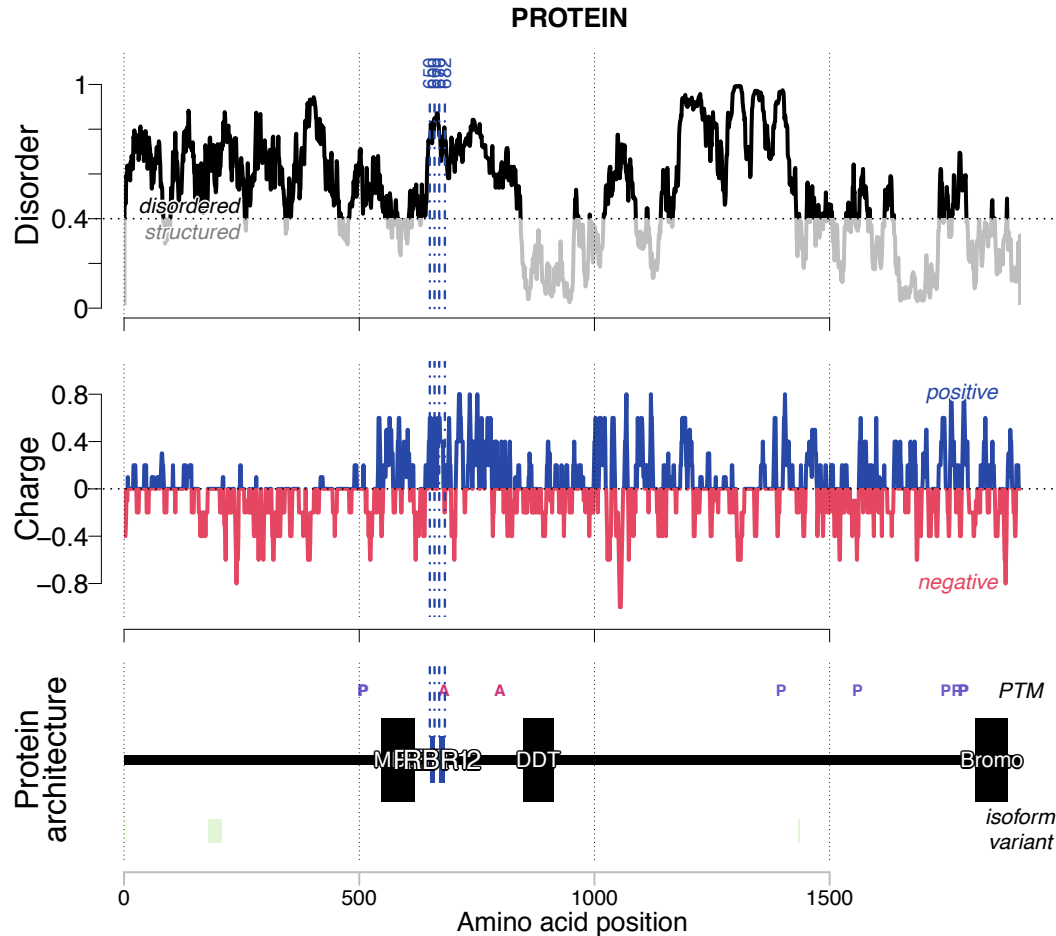

## RNA BINDING DISORDERED PEPTIDE

### RBR 1

650GKRGRPRNTEK660

### RBR 2

670KRGRRPPKVKIT682

## GO biological processes

chromatin remodeling, chromatin silencing at rDNA, DNA methylation, gene expression, heterochromatin assembly involved in chromatin silencing, histone deacetylation, histone H3-K9 methylation, histone H4 deacetylation, histone H4-K20 methylation, negative regulation of gene expression, epigenetic, regulation of gene expression, epigenetic, regulation of tran...

## GO molecular functions

DNA binding, ligand-dependent nuclear receptor binding, lysine-acetylated histone binding, RNA binding, zinc ion binding

## GO cellular compartments

chromatin silencing complex, nucleolus, rDNA heterochromatin

### Note:

Tip5 is involved in epigenetic alterations in prostate cancer and its overexpression predicts disease recurrence.

**PTOV1**  
**Prostate tumor-overexpressed gene 1 protein**  
 Activator interaction domain-containing protein 2  
 (Q86YD1)  
 (Homo sapiens)

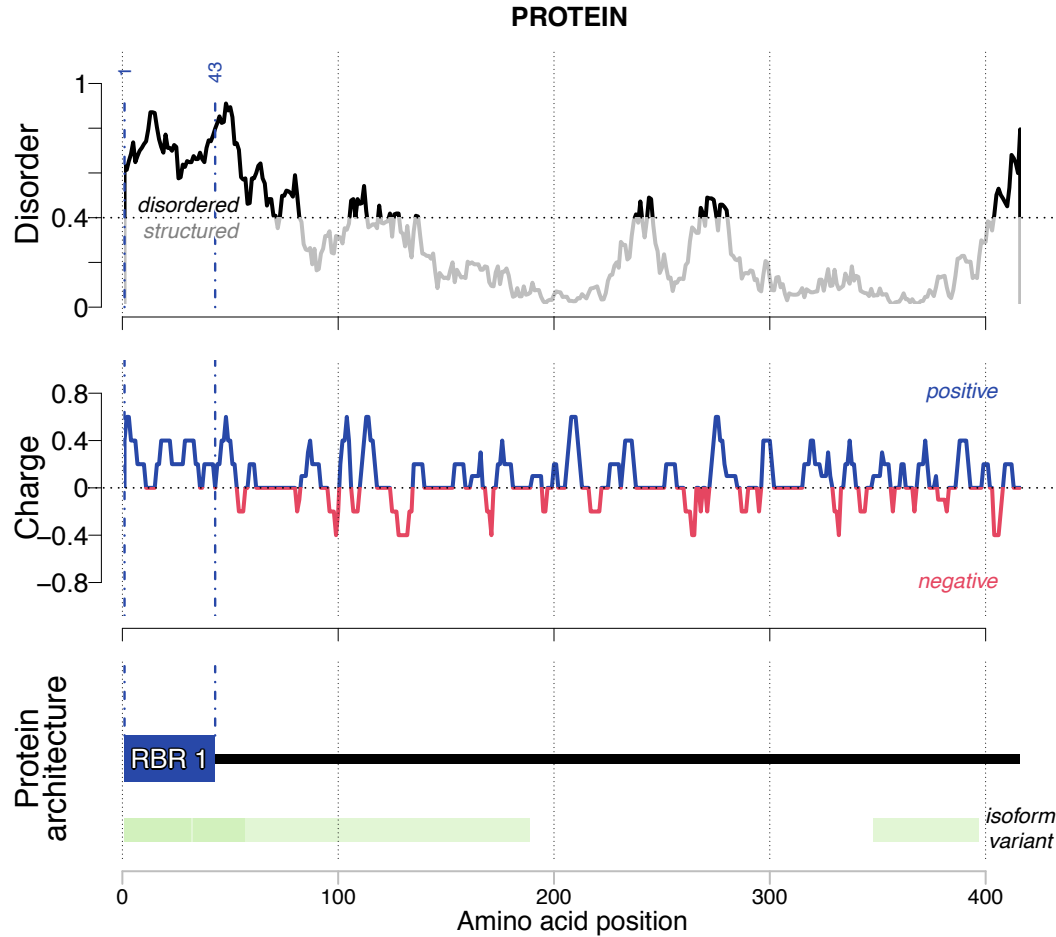

**RNA BINDING DISORDERED PEPTIDE**

**RBR 1**

1 MVRPRRAPYRSGAGGGLGGRGRPPRPLVVRAVRSRSPASPRG 43

**GO biological processes**  
 regulation of transcription, DNA-templated, transcription, DNA-templated

**GO molecular functions**  
 -

**GO cellular compartments**  
 intracellular membrane-bounded organelle, nucleus, perinuclear region of cytoplasm, plasma membrane

**Note:**  
 PTOV1 promotes cell proliferation and has been linked to malignant tumours.

# GPBP1

## Vasculin

GC-rich promoter-binding protein 1; Vascular wall-linked protein  
(Q86WP2)

(Homo sapiens)

### PROTEIN

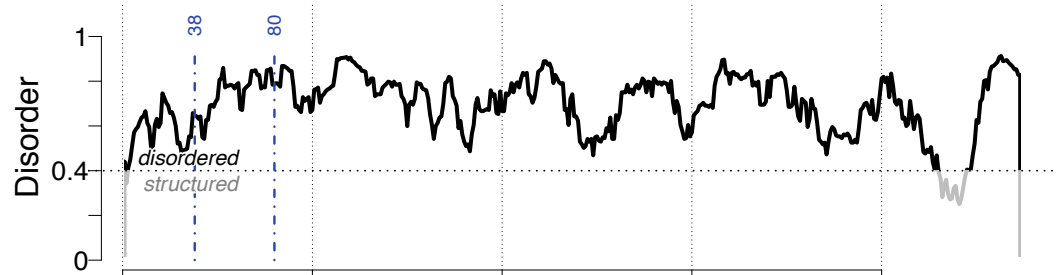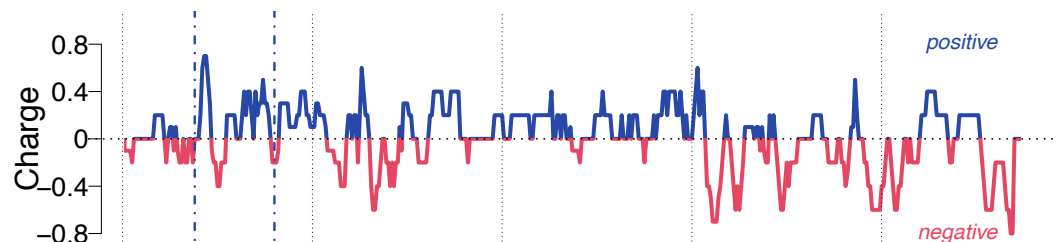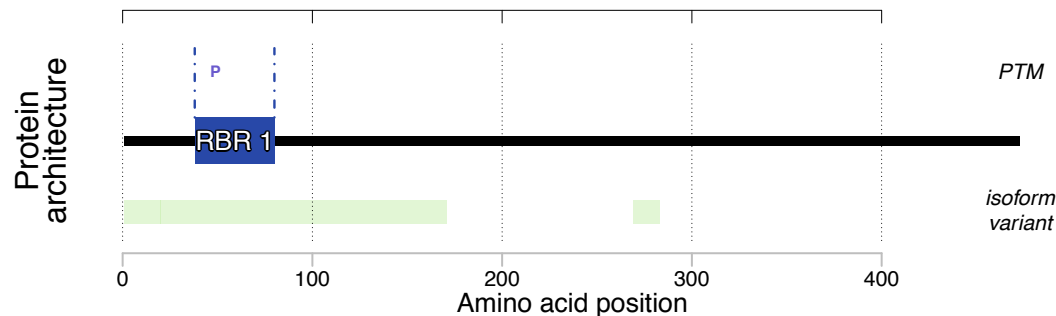

### RNA BINDING DISORDERED PEPTIDE

#### RBR 1

38 NRYDVNRRRRHNSSDGFDSAIGRPNGGNFGRKEKNGWRTHGRNG 80

#### GO biological processes

positive regulation of transcription, DNA-templated, transcription, DNA-templated

#### GO molecular functions

DNA binding, sequence-specific DNA binding transcription factor activity

#### GO cellular compartments

cytoplasm, intracellular membrane-bounded organelle, nucleolus, plasma membrane



# SRSF2

## Serine/arginine-rich splicing factor 2

Protein PR264; Splicing component, 35 kDa; Splicing factor SC35; Splicing factor, arginine/serine-rich 2 (Q01130)

(Homo sapiens)

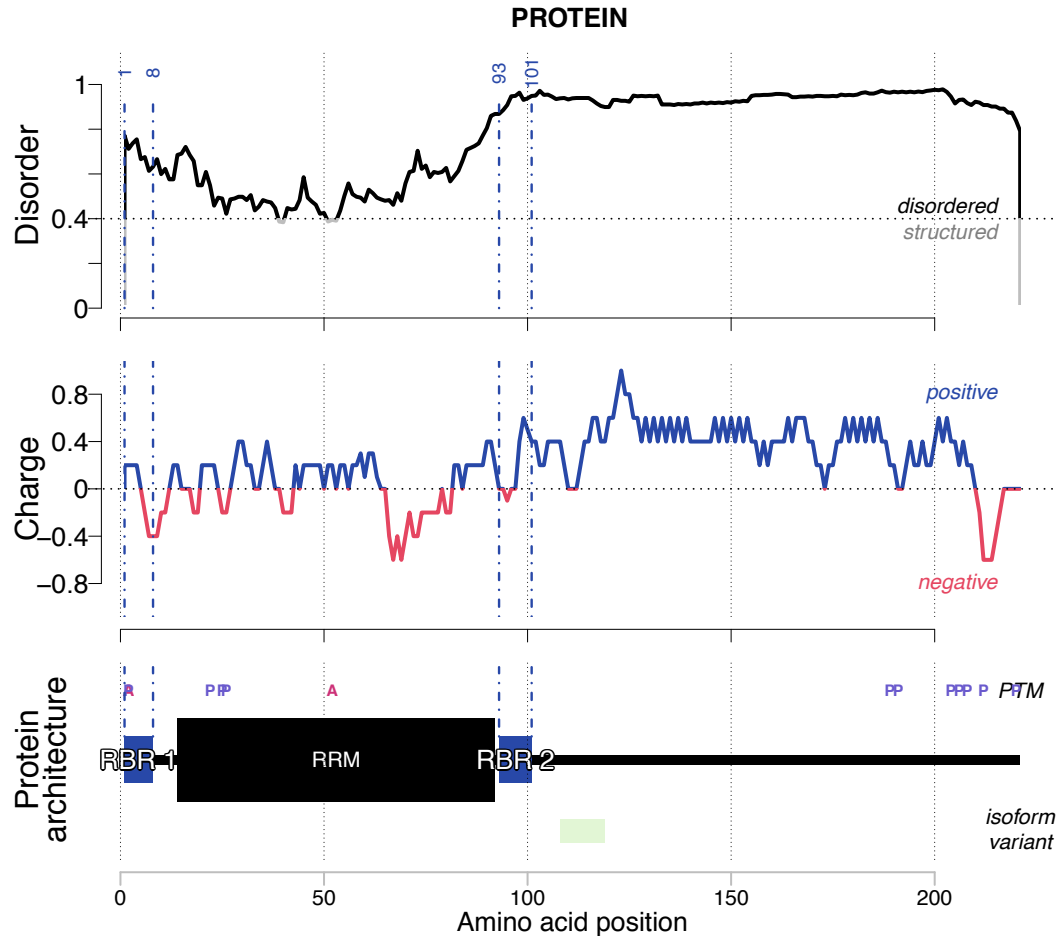

## RNA BINDING DISORDERED PEPTIDE

### RBR 1

1 MSYGRPPP 8

### RBR 2

93 GRPPDSHHS 101

## GO biological processes

gene expression, mRNA 3'-end processing, mRNA export from nucleus, mRNA processing, mRNA splicing, via spliceosome, negative regulation of nucleic acid-templated transcription, regulation of alternative mRNA splicing, via spliceosome, RNA splicing, termination of RNA polymerase II transcription, transcription from RNA polymerase II promoter

## GO molecular functions

nucleotide binding, poly(A) RNA binding, pre-mRNA binding, transcription corepressor activity

## GO cellular compartments

cytoplasm, extracellular exosome, nuclear speck, nucleoplasm, nucleus, spliceosomal complex

## Note:

These two disordered GRP regions flank the RRM and become more structured upon RNA binding. Pro6 and especially Pro95 form extensive contacts with the RNA through stacking. Deletion of these regions results in a slight decrease in affinity. Mutations in disordered RNA binding region (which mainly occur at P95) are associated with myelodysplastic syndromes and chronic myelomonocytic leukemia. P95H alters RNA binding affinity and results in altered splicing.

# Tra2B1

## Transformer-2 protein homolog beta

Splicing factor, arginine/serine-rich 10; Transformer-2 protein homolog B (P62995)

(Homo sapiens)

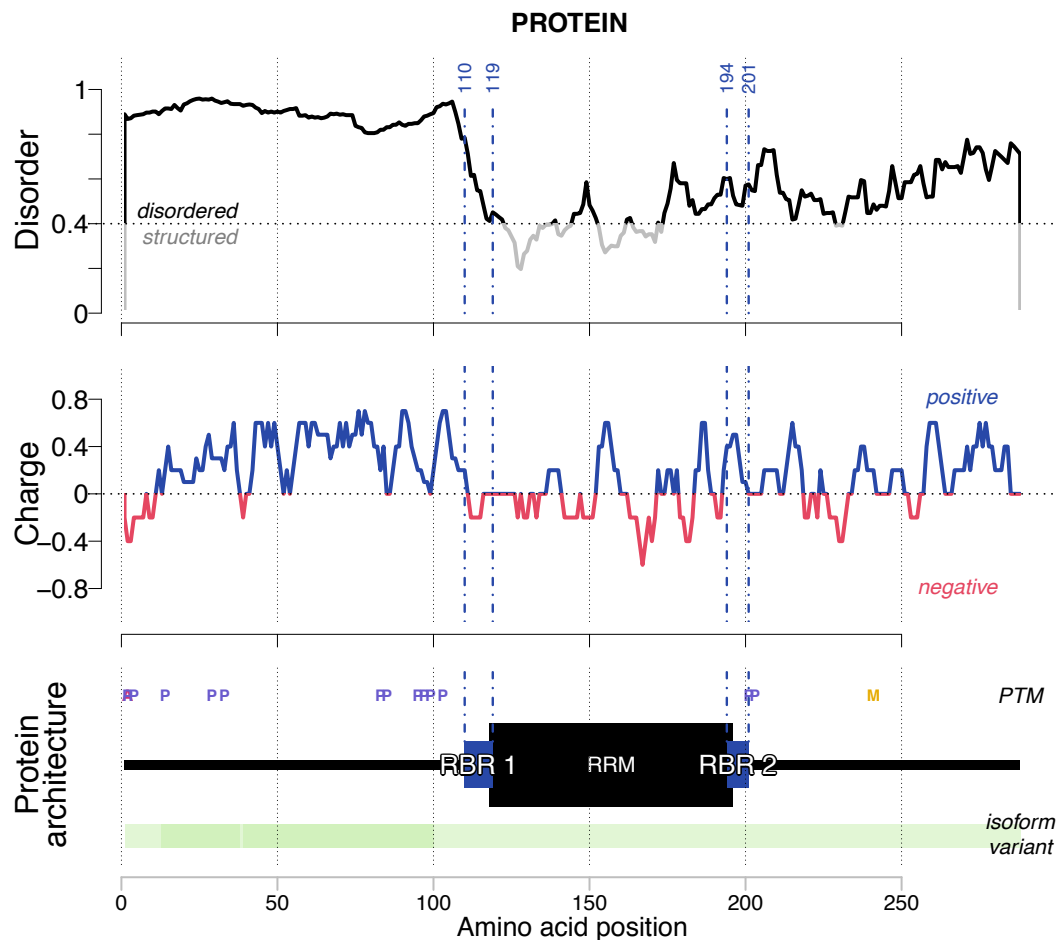

## RNA BINDING DISORDERED PEPTIDE

### RBR 1

110 N R A N P D P N C C 119

### RBR 2

194 S I T K R P H T 201

## GO biological processes

cerebral cortex regionalization, mRNA splicing, via spliceosome, positive regulation of mRNA splicing, via spliceosome, regulation of alternative mRNA splicing, via spliceosome, RNA splicing, via transesterification reactions

## GO molecular functions

mRNA binding, nucleotide binding, poly(A) RNA binding

## GO cellular compartments

nucleus

### Note:

These two disordered regions flank the RRM and contribute to formation of a binding pocket. The regions become structured upon RNA binding. The Args on each flanking region are specifically involved in the interaction. Deletion of flanking regions (individually) decreases binding affinity. RNA binding induces positioning of the two RS regions in this protein relative to each other.

# hnRNPA1

## Heterogeneous nuclear ribonucleoprotein A1

Helix–destabilizing protein; Single–strand RNA–binding protein; hnRNP core protein A1  
(P09651)

(Homo sapiens)

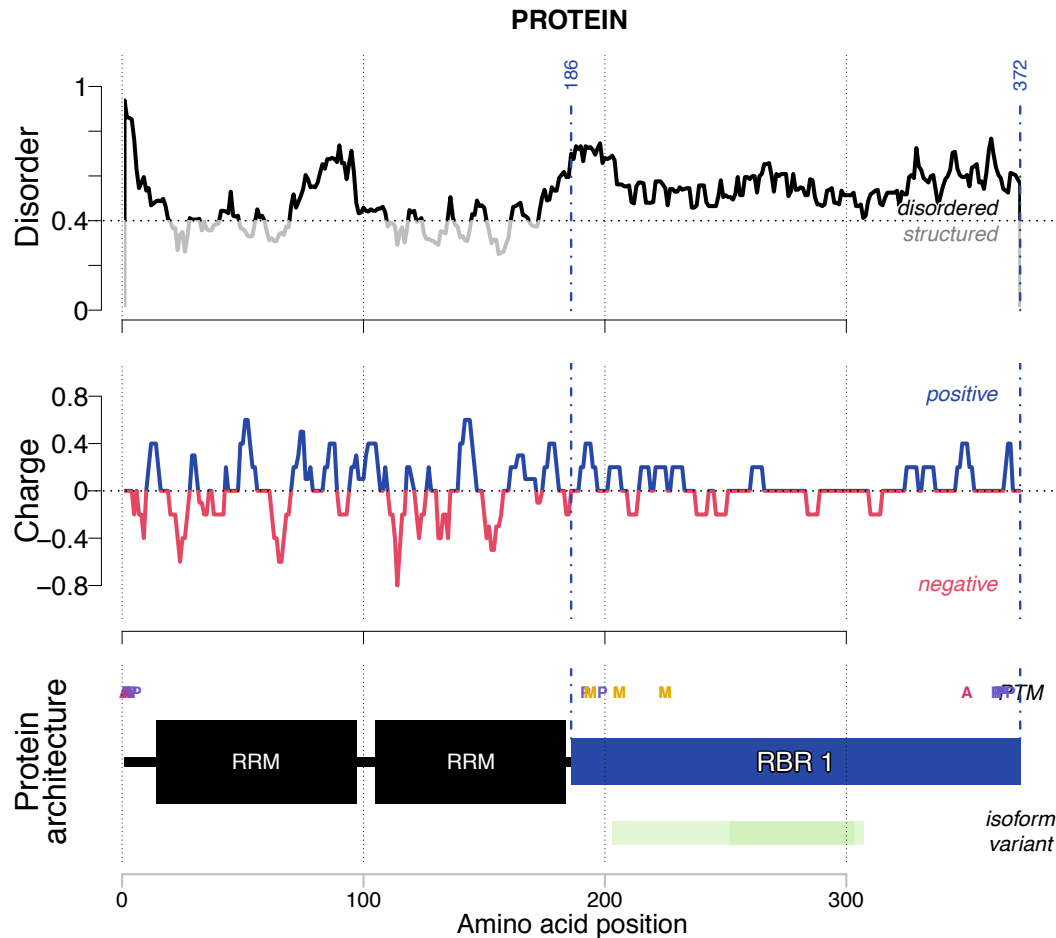

## RNA BINDING DISORDERED PEPTIDE

### RBR 1

186 M A S A S S S Q R G R S G S G N F G G G R G G G F G G N D N F R G G N F S G R G G F G G S R G G G G Y G G S D G Y N  
G F G N D G G Y G G G G P G Y S G G S R G Y G S G G Q Y G N Q G S G Y G G S G S Y D S Y N N G G G G G F G G G S G S N  
F G G G S Y N D F G N Y N N Q S S N F G P M K G G N F G G R S S G P Y G G G G Q Y F A K P R N Q G G Y G G S S S S S  
Y G S G R R F 372

### GO biological processes

alternative mRNA splicing, via spliceosome, gene expression, mRNA processing, mRNA splicing, via spliceosome, mRNA transport, nuclear export, nuclear import, RNA export from nucleus, RNA splicing, viral process

### GO molecular functions

nucleotide binding, poly(A) RNA binding, RNA binding, single–stranded DNA binding, single–stranded RNA binding

### GO cellular compartments

catalytic step 2 spliceosome, cytoplasm, extracellular exosome, intermediate filament cytoskeleton, membrane, nucleoplasm, ribonucleoprotein complex, spliceosomal complex

### Note:

The low complexity region of hnRNPA1 promotes phase separation and granule assembly. The low complexity sequence contains an RGG region that has been proposed to bind RNA. Additional regions may also contribute to RNA binding. Note also the presence of FG–dipeptides in this sequence (similar to Nott et al.) These genes have been linked to amyotrophic lateral sclerosis, frontotemporal dementia, myopathy, and multisystem proteinopathy.

# LUZP4

## Leucine zipper protein 4

Cancer/testis antigen 28; Tumor antigen HOM-TES-85  
(Q9P127)

(Homo sapiens)

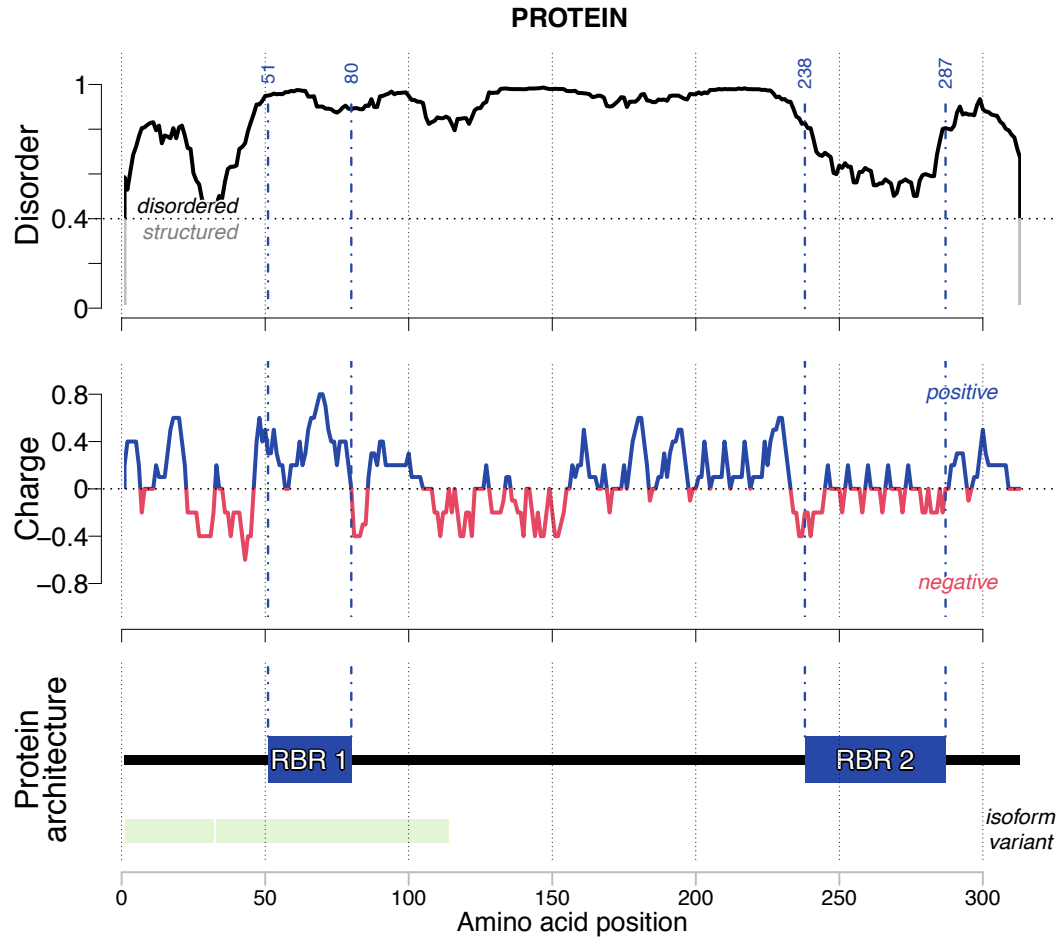

## RNA BINDING DISORDERED PEPTIDE

### RBR 1

51 RQNHSKKEPSRQQSKAHRHRHRRGYSRCR 80

### RBR 2

238 LVDTQSDL IATQRDL IATQKDL IATQRDL IATQRDL IVTQRDLVATERDL 287

## GO biological processes

cell growth, mRNA export from nucleus

## GO molecular functions

poly(A) RNA binding, single-stranded DNA binding, single-stranded RNA binding

## GO cellular compartments

cytoplasm, nucleus

### Note:

The entire protein is predicted disordered. The precise boundaries of the two RNA-binding regions are not sharply defined. The second RNA-binding regions overlaps a predicted leucine zipper motif that may orient positively charged residues within this region.

# ORF57

## mRNA export factor ICP27 homolog

52 kDa immediate-early phosphoprotein; EB2 protein homolog  
(P13199)

(Saimiriine herpesvirus 2 (strain 11))

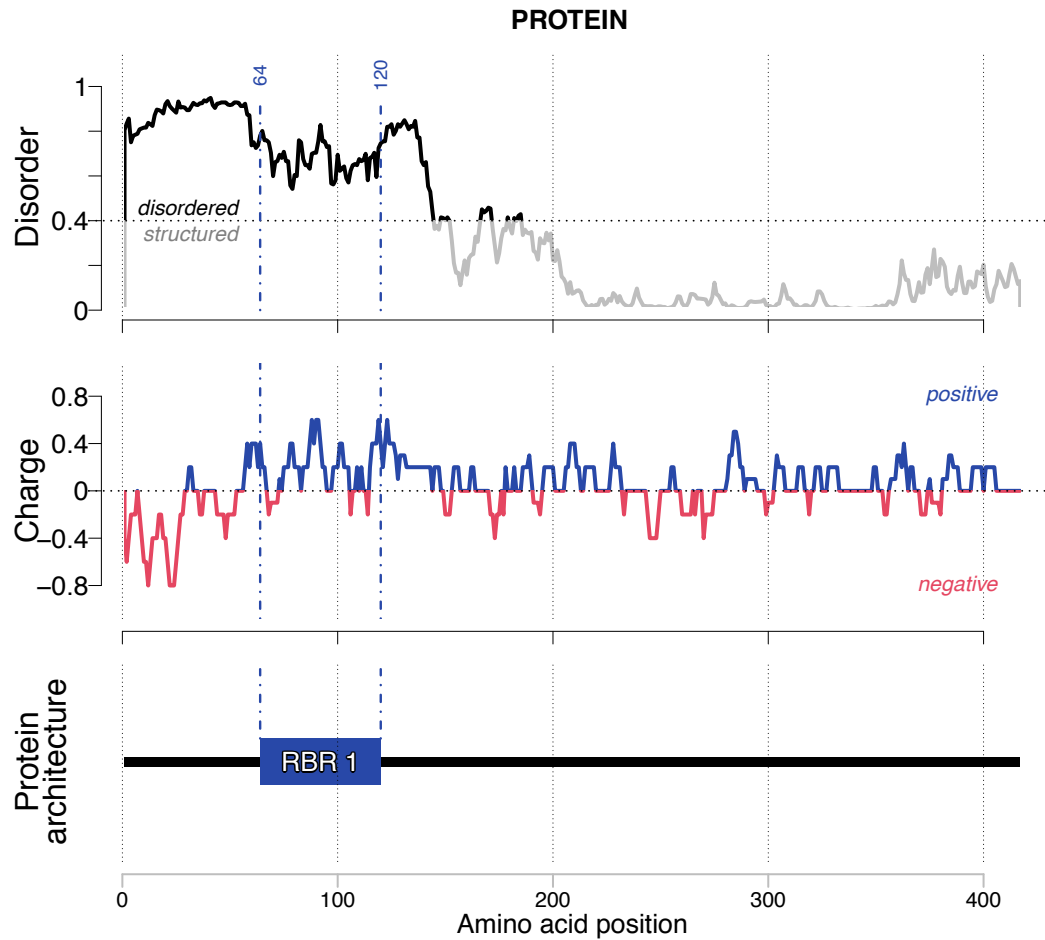

## RNA BINDING DISORDERED PEPTIDE

### RBR 1

64 RQRSP | TWEHQSP LSRVYRSPSPMRF GKRPR | SSNSTSRSC KTSWADRVREAAAQRR 120

### GO biological processes

regulation of transcription, DNA-templated, transcription, DNA-templated

### GO molecular functions

metal ion binding, RNA binding

### GO cellular compartments

host cell cytoplasm, host cell nucleus

### Note:

The last 15 amino acids of the highlighted sequence form an alpha-helical structure. A ternary complex may form between ORF57, ALYREF, and viral RNA.

# APC

## Adenomatous polyposis coli protein

(Q61315)

(Mus musculus)

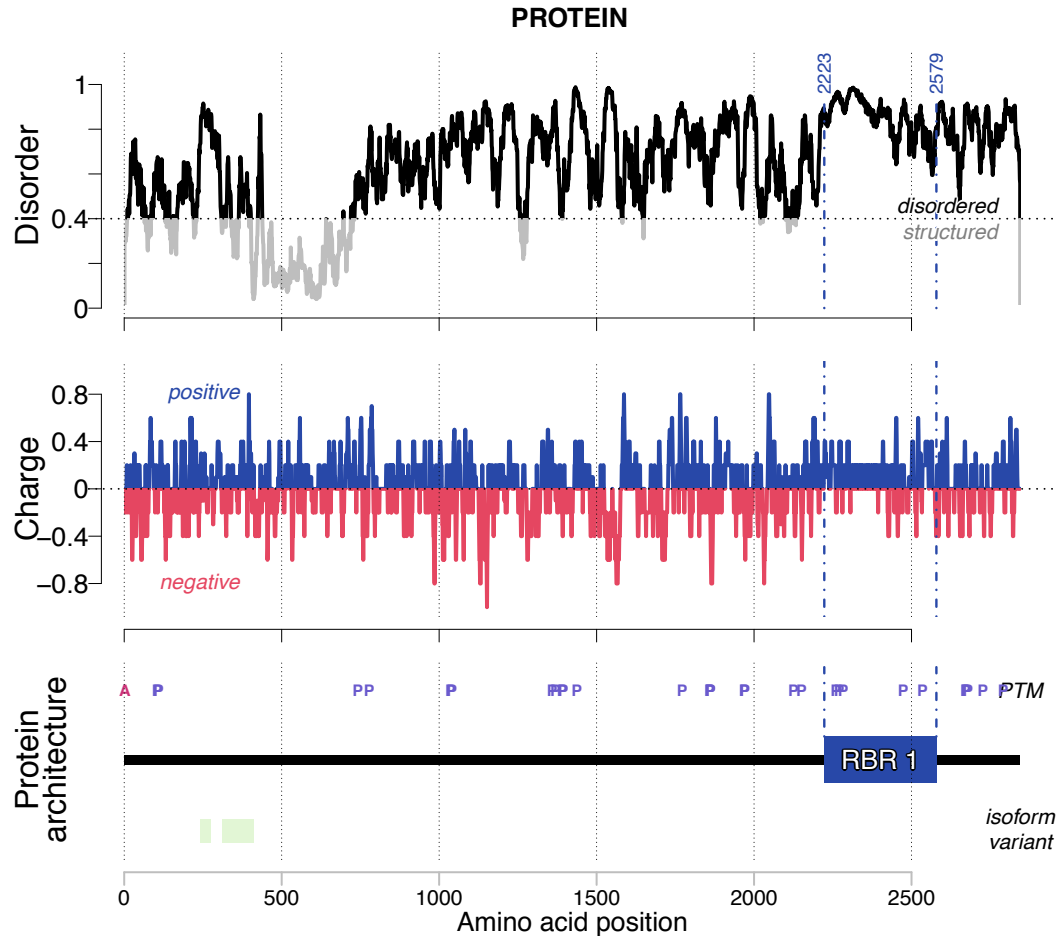

### RNA BINDING DISORDERED PEPTIDE

#### RBR 1

2223S I SRGRTM I H I PGLRNSSSSSTSPVSKKGPPPLKTPASKSPSEGGGATTSPRGTKPAGKSEL  
 S P I TRQTSQ I SGSNKGSSRSRSDSTPSRPTQQPLSRPMQSPGRNS I SPGRNG I SPPNKL  
 SQLPRTSSPSTASTKSSGSGKMSYTSRGRQLSQQLTKQASLSKNASS I PRSESASKGLN  
 QMSNGNGSNKKVELSRMSSTKSSGSESDSSERPALVRQSTF I KEAPSPPTLRRKLEESASF  
 ESLSPSSRPDSPTRSQAQTPVLSPLPDMSLSTHPSVQAGGWRKLPNLSPT I EYNDGRP  
 TKRHD I ARSHSESPRLP I NRAGTWKREHSHKSSSLPRVSTWRRTGSSSS I LSASSE<sup>2579</sup>

#### GO biological processes

anterior/posterior pattern specification, axis specification, axonogenesis, canonical Wnt signaling pathway, canonical Wnt signaling pathway involved in negative regulation of apoptotic process, canonical Wnt signaling pathway involved in positive regulation of apoptotic process, cell cycle arrest, cell migration, cellular response to DNA damage stimulus, ch...

#### GO molecular functions

beta-catenin binding, gamma-catenin binding, microtubule binding, microtubule plus-end binding, protease binding, protein kinase binding, protein kinase regulator activity

#### GO cellular compartments

adherens junction, axon, axonal growth cone, beta-catenin destruction complex, bicellular tight junction, catenin complex, cell projection, cell projection membrane, centrosome, cytoplasm, growth cone, kinetochore, lamellipodium, lateral plasma membrane, microtubule, nucleus, plasma membrane, ruffle membrane, Scrib-APC-beta-catenin complex

#### Note:

Linked to hereditary desmoid disease, medulloblastoma, and Mismatch repair cancer syndrome.

# CTCF

## Transcriptional repressor CTCF

11-zinc finger protein; CCCTC-binding factor; CTCFL paralog (P49711)

(Homo sapiens)

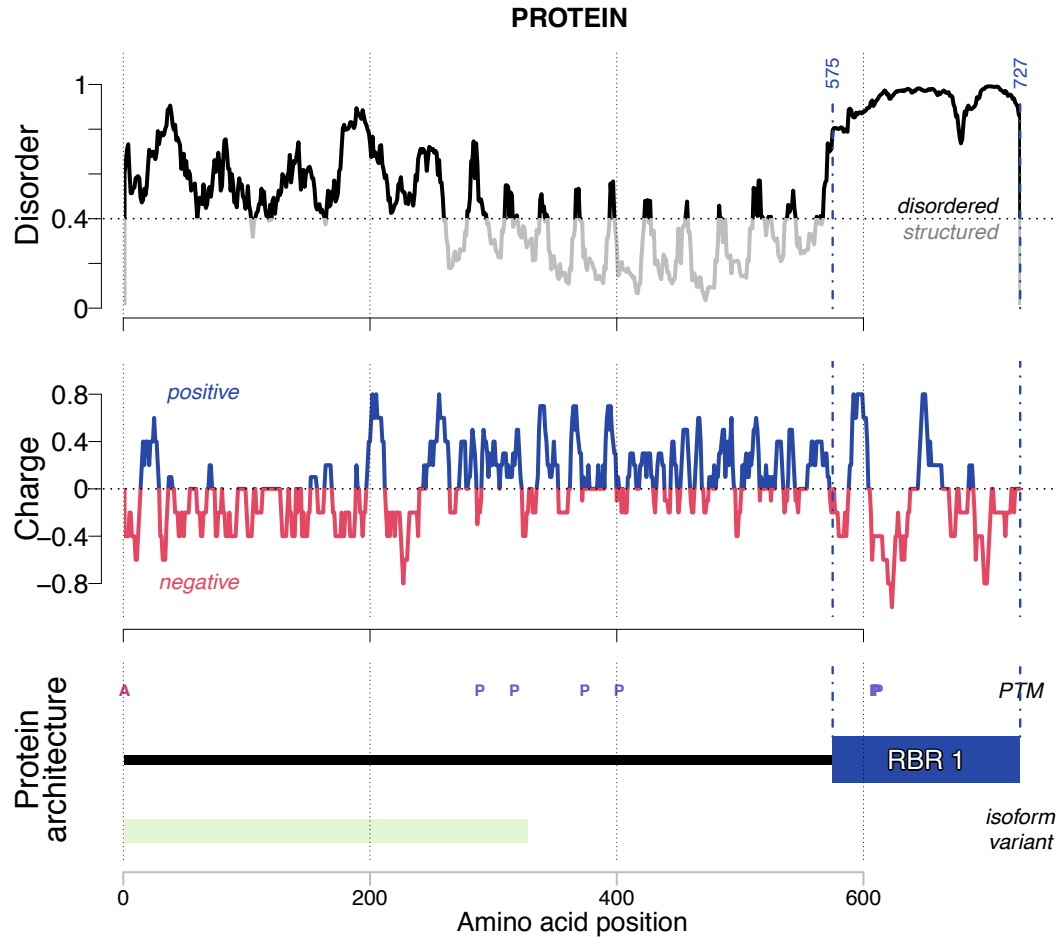

## RNA BINDING DISORDERED PEPTIDE

### RBR 1

575 D N C A G P D G V E G E N G G E T K K S K R G R K R K M R S K K E D S S D S E N A E P D L D D N E D E E E P A V E I E P  
E P E P Q P V T P A P P P A K K R R G R P P G R T N Q P K Q N Q P T A I I Q V E D Q N T G A I E N I I V E V K K E P D A  
E P A E G E E E E A Q P A A T D A P N G D L T P E M I L S M M D R 727

### GO biological processes

chromatin modification, chromosome segregation, DNA methylation, maintenance of DNA methylation, negative regulation of transcription from RNA polymerase II promoter, negative regulation of transcription, DNA-templated, nucleosome positioning, positive regulation of gene expression, positive regulation of transcription, DNA-templated, regulation of centromere...

### GO molecular functions

chromatin insulator sequence binding, RNA polymerase II core promoter proximal region sequence-specific DNA binding, RNA polymerase II core promoter proximal region sequence-specific DNA binding transcription factor activity involved in negative regulation of transcription, RNA polymerase II transcription regulatory region sequence-specific DNA binding trans...

### GO cellular compartments

chromosome, centromeric region, condensed chromosome, nucleolus, nucleoplasm, nucleus

### Note:

Deletion of the basic patch containing region (NCAGPDGVEGENGGGETKKS KRGRKRKMR SKKEDSSDSEN) drastically reduced RNA binding. CTCF has 11 annotated zinc finger domains between residues 266-577 not visualised here as they are not currently annotated in UniProt under domain feature key.

# Df31

Anon1A4; CG2207-PA, isoform A; Decondensation factor 31, isoform B; Decondensation factor 31, isoform F; LD21289p

(O16043)

(Drosophila melanogaster)

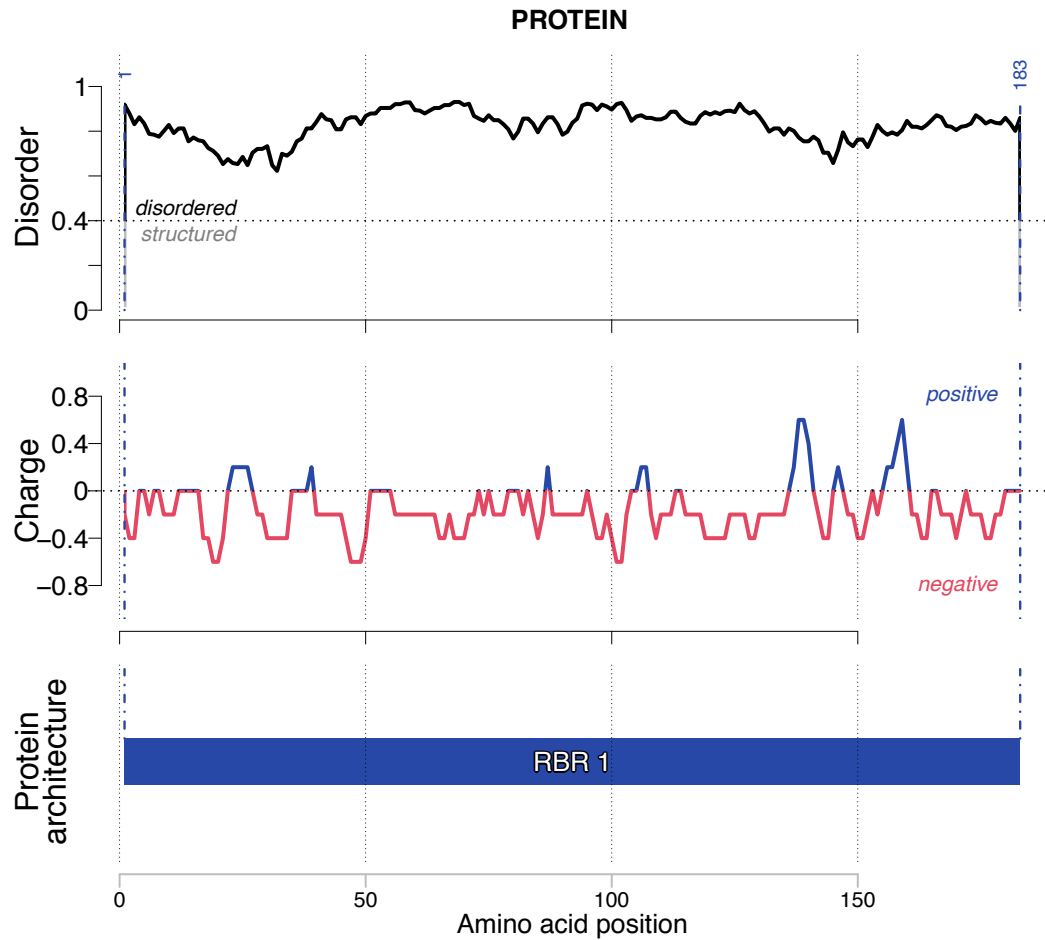

## RNA BINDING DISORDERED PEPTIDE

### RBR 1

1 MADVAEQKNETPVVEKVAAEEVDVAVKDDAVAAEEVAAEKASITENGGAEFEESVAKENGAA  
DSSATEPTDAVDGEKASEPTVSVFAADKDEKKDEKEDSAADGEDTKKESSEAVLPAVEN  
GSEEVINGDSTDAPAI EAVKRKVD EAAA KADEAVATPEKKAKLDEASTKDEVQNGAEASE  
VAA 183

### GO biological processes

chromatin organization, nucleosome assembly

### GO molecular functions

histone binding

### GO cellular compartments

chromatin, cytoplasm, nucleus, plasma membrane

### Note:

This short protein is entirely disordered. The sequence provided is the full length protein sequence as region involved in RNA binding was not narrowed down in the study. Df31 binds histones in a co-operative manner with RNA binding. Whether the binding sites overlap is not known.



# Ezh2

## Histone-lysine N-methyltransferase EZH2

ENX-1; Enhancer of zeste homolog 2  
(Q61188)  
(Mus musculus)

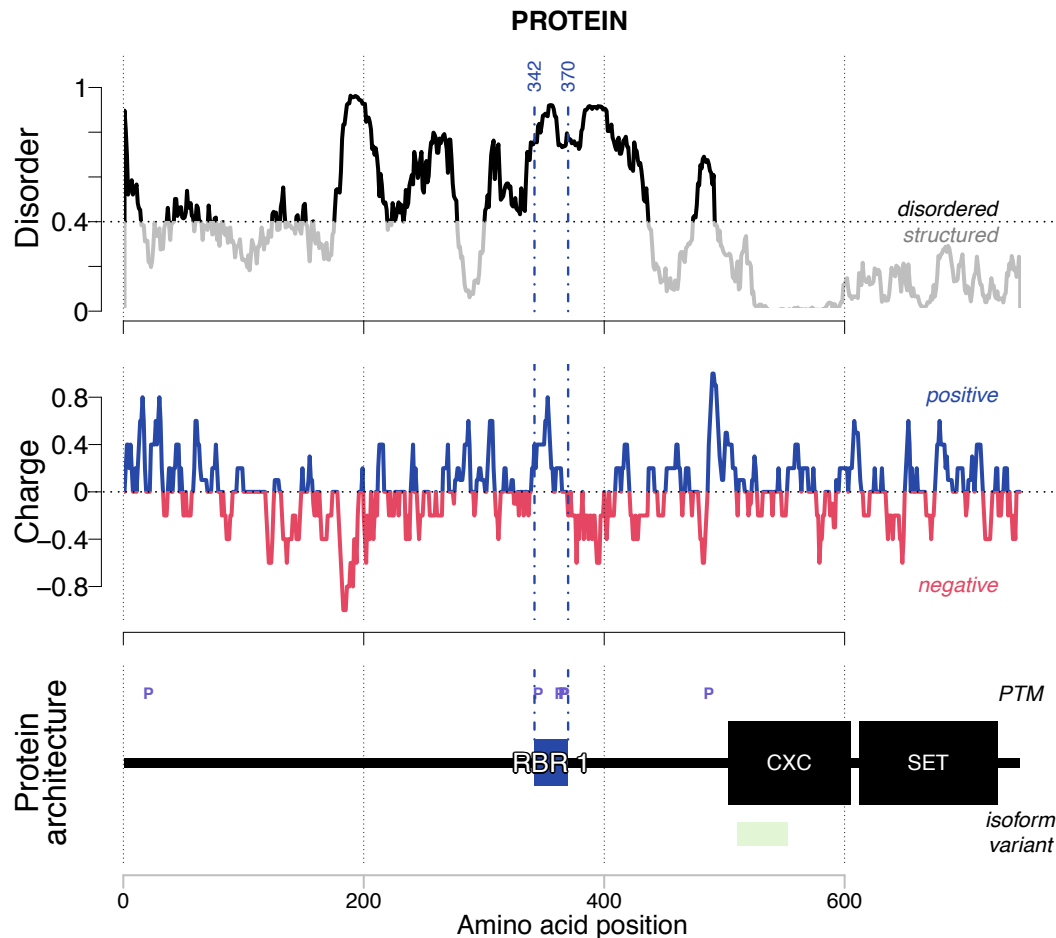

## RNA BINDING DISORDERED PEPTIDE

**RBR 1**  
342 R | K T P P K R P G G R R R G R L P N N S S R P S T P T | 370

### GO biological processes

cellular response to hydrogen peroxide, cerebellar cortex development, DNA methylation, G1 to G0 transition, hippocampus development, histone H3-K27 methylation, histone methylation, negative regulation of epidermal cell differentiation, negative regulation of G1/S transition of mitotic cell cycle, negative regulation of gene expression, epigenetic, negative...

### GO molecular functions

chromatin binding, chromatin DNA binding, core promoter binding, histone methyltransferase activity, histone-lysine N-methyltransferase activity, protein-lysine N-methyltransferase activity, RNA binding, sequence-specific DNA binding

### GO cellular compartments

cytoplasm, ESC/E(Z) complex, nuclear chromatin, nucleoplasm, nucleus, pronucleus

**Note:**  
Deletion is early embryonic lethal.

**Nrep**  
**Neuronal regeneration-related protein**  
 Neuronal protein 3.1; Protein p311  
 (Q07475)  
 (Mus musculus)

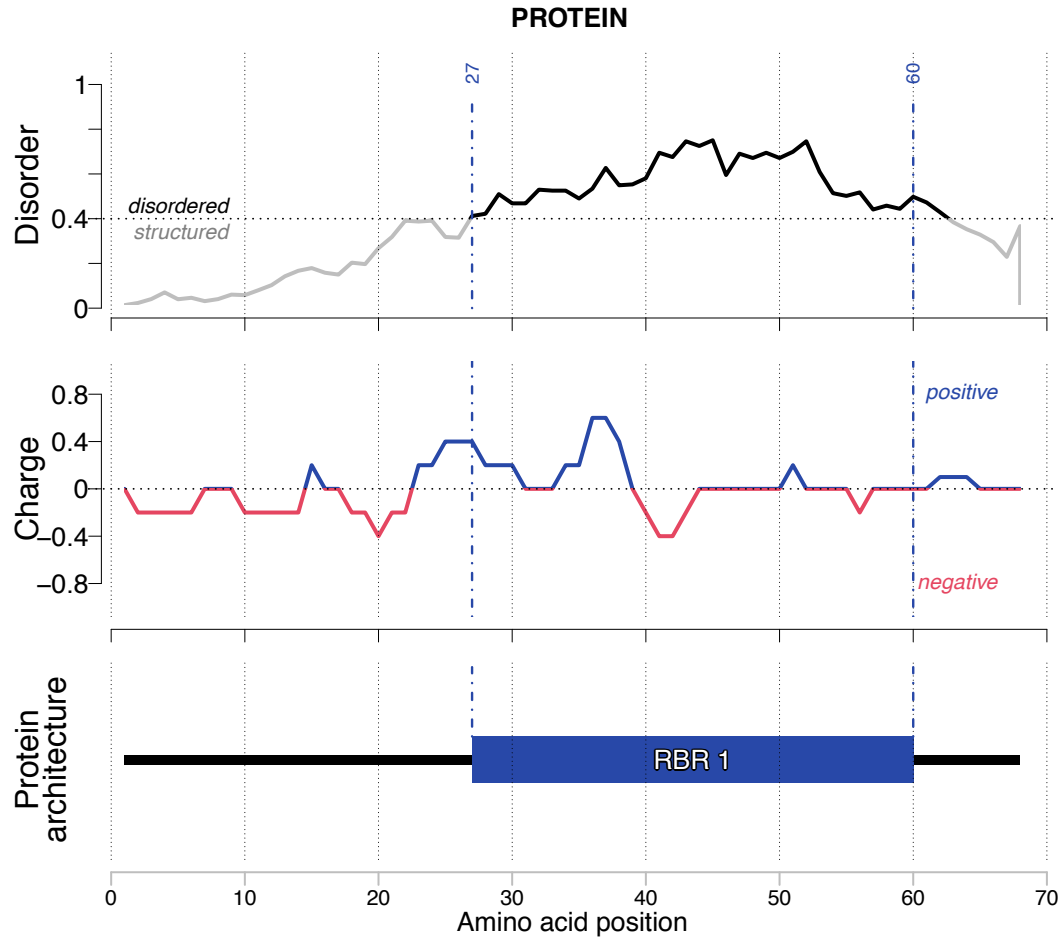

**RNA BINDING DISORDERED PEPTIDE**

**RBR 1**  
 27 **KGRLVPPK**EVNRKK**MEETGAASLT**PPGS**R**EF**T**SP 60

**GO biological processes**

axon regeneration, regulation of neuron differentiation, regulation of transforming growth factor beta receptor signaling pathway

**GO molecular functions**

-

**GO cellular compartments**

cytoplasm, nucleus

**Note:**  
 Linked to glioma / brain cancer.

# Gemin5

## Gem-associated protein 5

(Q8TEQ6)

(Homo sapiens)

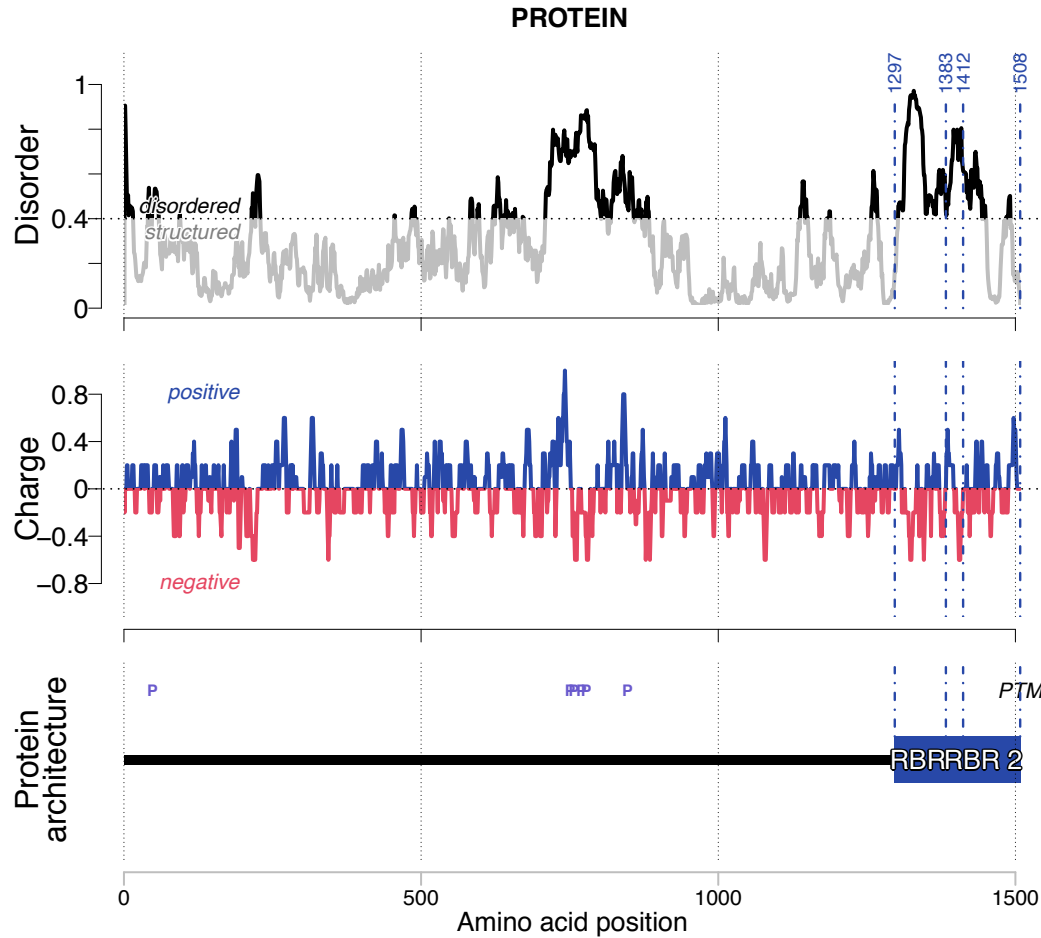

## RNA BINDING DISORDERED PEPTIDE

### RBR 1

1297 PNSSVWVRAGHRTLSEVPSQQLDTASTEETDPETSQPEPNRPELDRLLTEEGERM LSTF  
KELFSEKHASLQNSQRTVAEVQETLAEMI RQHQKSQ LCKSTANGPDKNEPEVEAEQ<sup>1412</sup>

### RBR 2

1383 EMI RQHQKSQ LCKSTANGPDKNEPEVEAEQPLCSSQSQCKEEKNEPLSLPELTKRLTEAN  
QRMAKFPESI KAWPPFDVLECCLVLLLIRSHFPGCLAQEMQQQAQELLQKYGNTKTYRRH  
CQTF<sup>CM1508</sup>

### GO biological processes

gene expression, mRNA splicing, via spliceosome, ncRNA metabolic process, protein complex assembly, spliceosomal snRNP assembly

### GO molecular functions

poly(A) RNA binding, snRNA binding

### GO cellular compartments

cytoplasm, cytosol, Gemini of coiled bodies, membrane, nuclear body, nucleoplasm, nucleus, SMN complex, SMN-Sm protein complex

# Nup153

## Nuclear pore complex protein Nup153

153 kDa nucleoporin; Nucleoporin Nup153  
(P49790)

(Homo sapiens)

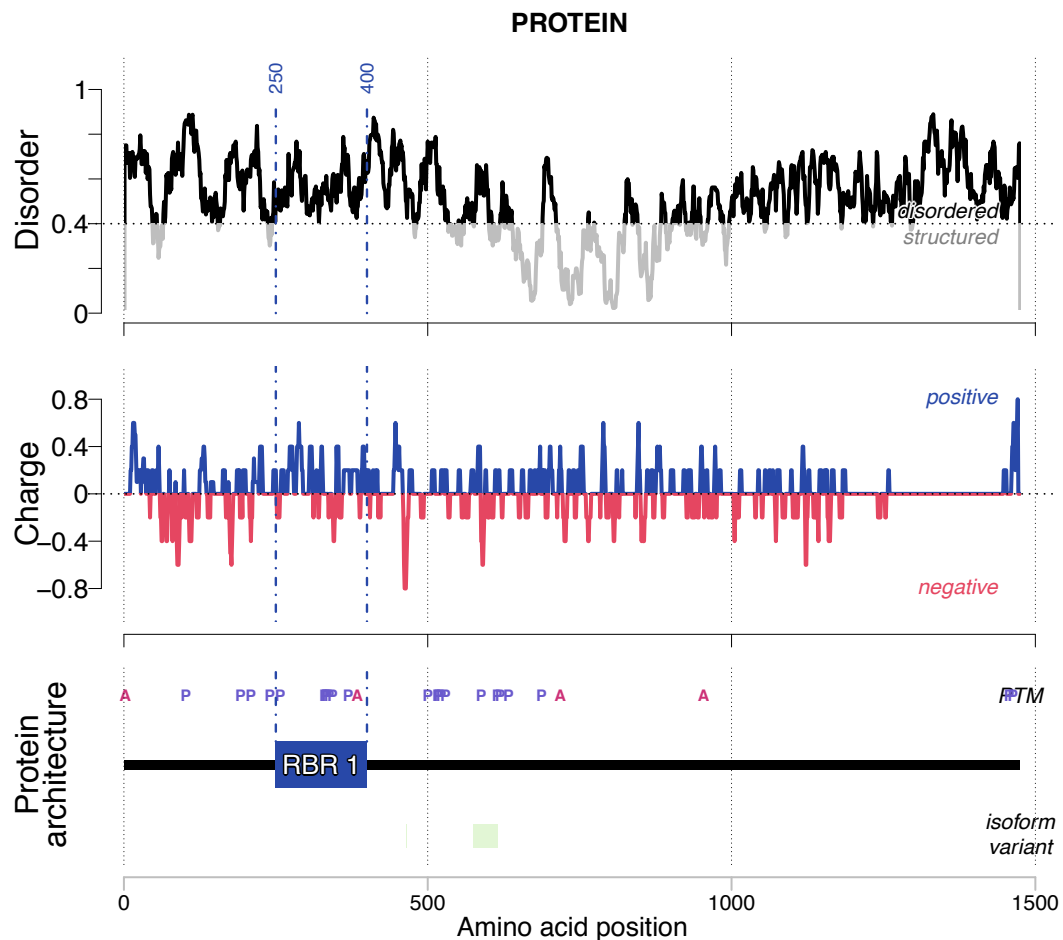

## RNA BINDING DISORDERED PEPTIDE

### RBR 1

250 KTSQLGDSPFYPGKTTYGGAAAARQSKLRNTPYQAPVRRQMKAKQLSAQSYGVTSSSTAR  
RILQSLEKMSSPLADAKRIPSI VSSPLNSPLDRSGIDITDFQAKREK VDSQYPPVQRLMT  
PKPVS IATNRSVYFKPSLT P SGEFRKTNQR I 400

### GO biological processes

carbohydrate metabolic process, cellular protein metabolic process, cellular response to heat, cytokine-mediated signaling pathway, gene expression, glucose transport, hexose transport, mitotic cell cycle, mitotic nuclear envelope disassembly, mRNA transport, negative regulation of RNA export from nucleus, nuclear pore complex assembly, post-translational pr...

### GO molecular functions

DNA binding, identical protein binding, nucleocytoplasmic transporter activity, protein anchor, structural constituent of nuclear pore, transporter activity, zinc ion binding

### GO cellular compartments

cytoplasm, nuclear inclusion body, nuclear lamina, nuclear membrane, nuclear periphery, nuclear pore, nuclear pore nuclear basket, nucleolus, nucleoplasm

# SCML2

## Sex comb on midleg-like protein 2

(Q9UQR0)  
(Homo sapiens)

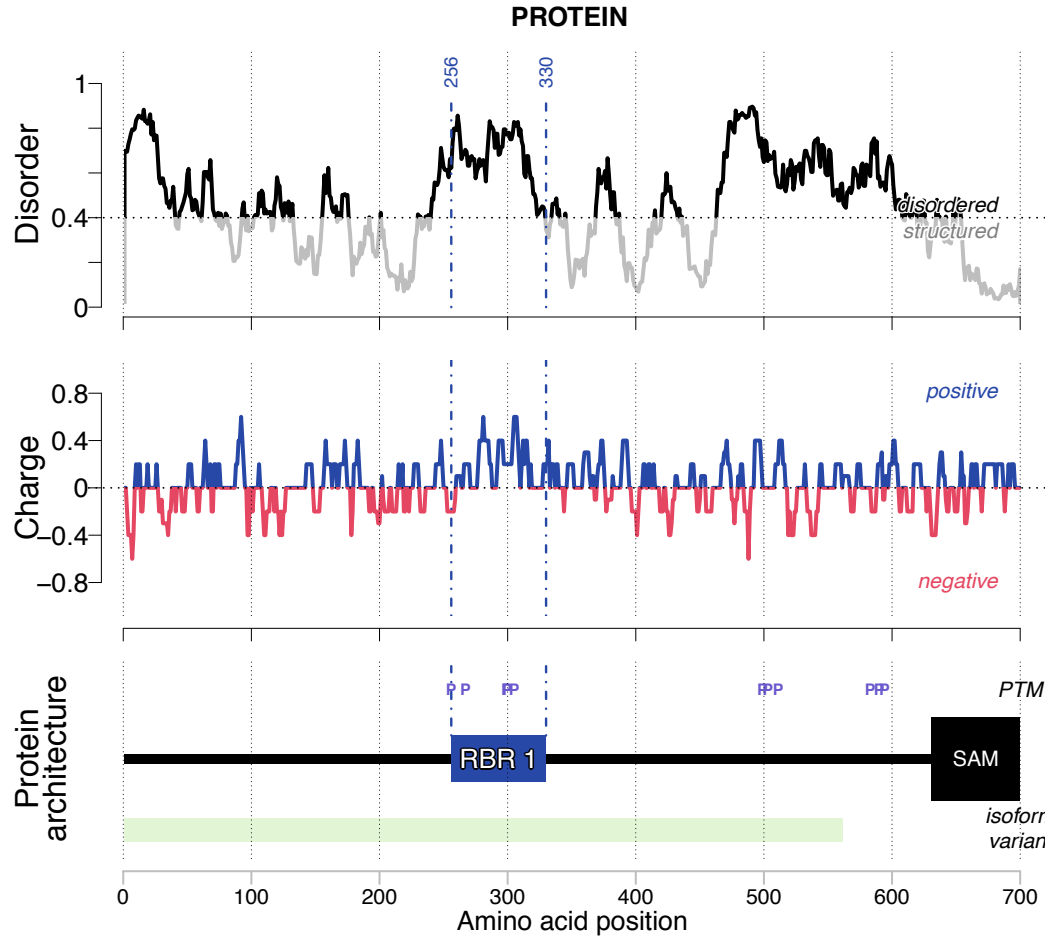

**RNA BINDING DISORDERED PEPTIDE**

**RBR 1**

256 SPSEASQHSMQSPQKTTLLPTQQVRRSSRIKPPGPPTAVPKRSSSVKNIIPRKKGPNSGK  
KEKPLPVI C STSAAS 330

**GO biological processes**  
anatomical structure morphogenesis, transcription, DNA-templated

**GO molecular functions**  
DNA binding, sequence-specific DNA binding transcription factor activity

**GO cellular compartments**  
nucleus, PcG protein complex

# KDM4D

## Lysine-specific demethylase 4D

JmjC domain-containing histone demethylation protein 3D; Jumonji domain-containing protein 2D  
(Q6B0I6)

(Homo sapiens)

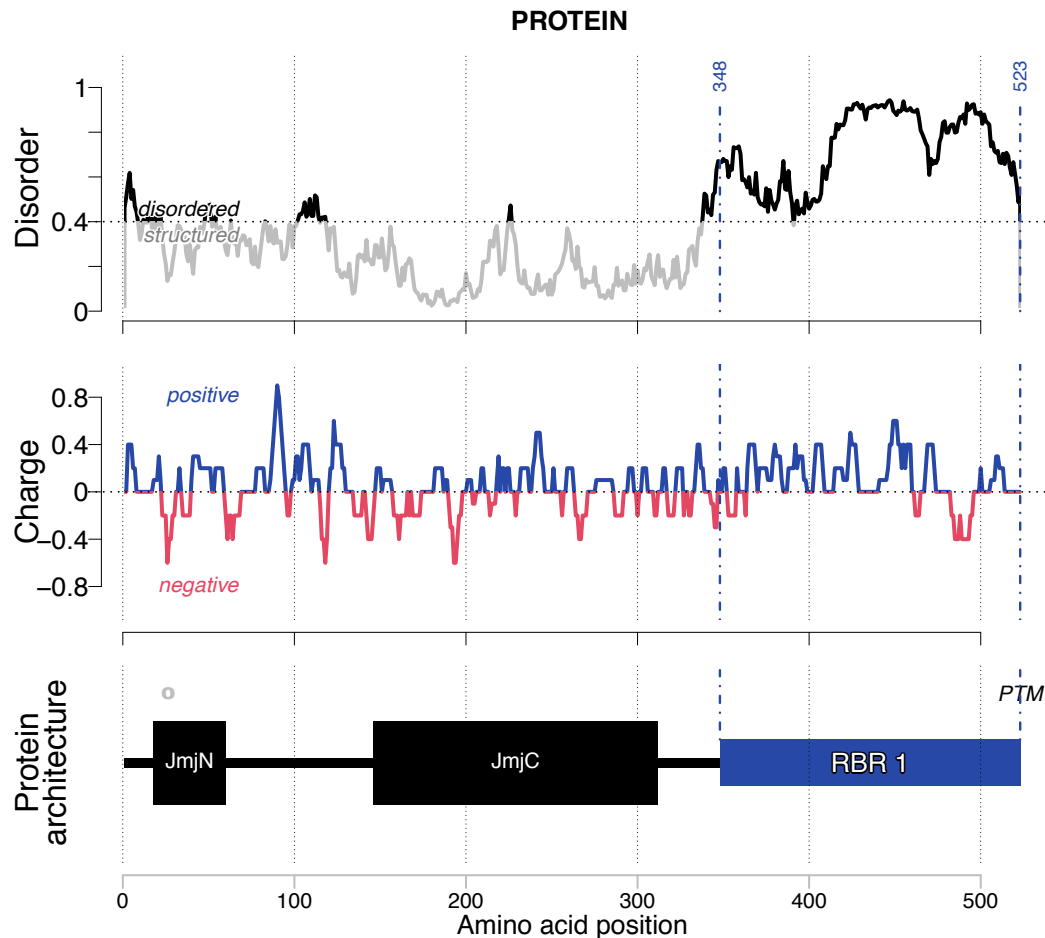

## RNA BINDING DISORDERED PEPTIDE

### RBR 1

<sup>348</sup>MEPRVPASQELSTQKEVQLPRAALGLRQLPSHWARHSPWPM AARSGTRCHTLVCSLPR  
RS AVSGTATQPRAAAVHSSKKPSSTPSSTPGPSAQ I I HPSNGRRRGRGRPPQKLRAQELTL  
QTPAKRPLLAGTTCTASGPEPELPEDGALMDKPVPLSPGLQHPVKASGCSWAPVP<sup>523</sup>

### GO biological processes

chromatin organization, histone H3-K9 demethylation, regulation of transcription, DNA-templated, transcription, DNA-templated

### GO molecular functions

dioxygenase activity, histone demethylase activity (H3-K9 specific), metal ion binding

### GO cellular compartments

blood microparticle, nucleoplasm

### Note:

This region contains an RG-rich region (GRRGRGR) and di-R and di-K sequences that are good candidates residues for the reported interaction with RNA.
